# Supplementary material for: Cardiac electrophysiological remodeling associated with enhanced arrhythmia susceptibility in a canine model of elite exercise
Source: eLife journal article supplement (doi:10.7554/elife.80710), 2023-02-23
Supplement: fig1-data1 [file Figure1B-Presence of fibrosis.xls]

## Sheet: Sheet1
	Sedentary dogs	Trained dogs
	%	%
	n=12	n=12
Dogs	16.6667	58.3333

## Sheet: Sheet2
Fibrosis	Trained	Sedentary	Trained fibrosis	Sedentary fibrosis
	number of dogs	number of dogs	%	%
Left ventricular anterior wall
Fibrosis	7	2	58.3333	16.6667
No fibrosis	5	10	41.6667	83.3333
