# Supplementary material for: Cardiac electrophysiological remodeling associated with enhanced arrhythmia susceptibility in a canine model of elite exercise
Source: eLife journal article supplement (doi:10.7554/elife.80710), 2023-02-23
Supplement: fig1-data2 [file Figure1C-Fibrosis score.xls]

## Sheet: Sheet1
	Sedentary dogs	Sedentary dogs	Trained dogs	Trained dogs
	%	%	%	%
	n=12	SEM	n=12	SEM
Dogs	0.166667	0.112367	0.583333	0.148647

## Sheet: Sheet2
Sedentary dogs	Sedentary score	Trained dogs	Trained score
	Left ventricular anterior wall		Left ventricular anterior wall
FK_2	0	FK_1	1
FK_3	0	FK_4	0
FK_5	0	FK_7	1
FK_6	0	FK_8	1
FK_11	0	FK_9	0
FK_12	1	FK_10	0
FK15	0	FK13	0
FK16	0	FK14	0
FK17	0	FK18	1
FK20	1	FK19	1
FK21	0	FK23	1
FK22	0	FK24	1

## Sheet: DescStatsQuantities1
Data	N total	Mean	SE of mean	Lower 95% CI of Mean	Upper 95% CI of Mean
Descriptive Statistics	Descriptive Statistics	Descriptive Statistics	Descriptive Statistics	Descriptive Statistics	Descriptive Statistics
[FibroScoreDog]Sheet2
Sedentary score	12	0.166667	0.112367	-0.0806506	0.413984
Trained score	12	0.583333	0.148647	0.256163	0.910503
