# Supplementary material for: Cardiac electrophysiological remodeling associated with enhanced arrhythmia susceptibility in a canine model of elite exercise
Source: eLife journal article supplement (doi:10.7554/elife.80710), 2023-02-23
Supplement: fig2-data1 [file Figure2A-Heart rate.xls]

## Sheet: Sheet1
		Mean	SEM	Mean	SEM	Mean	SEM
		bpm	bpm	bpm	bpm	bpm	bpm
		Trained 0 week (n=12)	Trained 0 week (n=12)	Trained 16 week (n=12)	Trained 16 week (n=12)	Sedentary 16 week (n=12)	Sedentary 16 week (n=12)
Sedentary 0 week
Sedentary 16 week	Sedentary					111.344	5.71529
Trained 0 week	Trained	117.956	4.85008
Trained 16 week	Trained			84.9833	5.51203

## Sheet: Sheet2
Sedentary dogs	Sedentary 16 week	Trained dogs	Trained 0 week	Trained 16 week
	bpm		bpm	bpm
2	151.95	1	111.625	107.675
3	101.5	4	135.875	74.875
5	126.825	10	129.525	80.575
6	133.65	7	125.875	76.35
11	124.275	8	99.5	74.35
12	108.475	9	125.425	98.75
15	96.05	13	97.75	76.225
16	99.8	14	141.325	79.85
17	79.875	18	102.725	71.2
20	94.775	19	139.6	133.975
21	112.15	23	108.425	75.8
22	106.799	24	97.825	70.175

## Sheet: DescStatsQuantities1
Data	N total	Mean	SE of mean	Lower 95% CI of Mean	Upper 95% CI of Mean
		bpm	bpm	bpm	bpm
Descriptive Statistics	Descriptive Statistics	Descriptive Statistics	Descriptive Statistics	Descriptive Statistics	Descriptive Statistics
[HeartRateDogs]Sheet2
Sedentary 16 week	12	111.344	5.71529	98.7644	123.923
Trained 0 week	12	117.956	4.85008	107.281	128.631
Trained 16 week	12	84.9833	5.51203	72.8514	97.1152
