# Supplementary material for: Cardiac electrophysiological remodeling associated with enhanced arrhythmia susceptibility in a canine model of elite exercise
Source: eLife journal article supplement (doi:10.7554/elife.80710), 2023-02-23
Supplement: fig2-data2 [file Figure2B-RR variability.xls]

## Sheet: Sheet1
SED	SED	TRN	TRN
ms	ms	ms	ms
0 week	16 week	0 week	16 week
30.6315	8.02081	170.748	339.507
242.466	182.495	42.4793	263.98
16.5574	89.5307	57.0076	375.222
26.0777	18.8652	64.2812	383.965
26.5922	50.7646	150.405	611.23
46.5761	73.1815	30.6013	79.718
100.132	224.986	266.865	425.469
48.3373	149.149	56.1435	433.937
232.818	321.464	118.621	425.99
43.6413	285.018	45.3848	12.4504
63.6021	50.2398	167.025	316.002
100.611	48.6102	84.1367	298.506

## Sheet: DescStatsQuantities1
Data	N total	Mean	SE of mean
		ms	ms
Descriptive Statistics	Descriptive Statistics	Descriptive Statistics	Descriptive Statistics
[RRvariabDog]Sheet1
SED 0 week	12	81.5035	22.4426
SED 16 week	12	125.194	30.6393
TRN 0 week	12	104.475	20.6698
TRN 16 week	12	330.498	46.2447
