# Supplementary material for: Cardiac electrophysiological remodeling associated with enhanced arrhythmia susceptibility in a canine model of elite exercise
Source: eLife journal article supplement (doi:10.7554/elife.80710), 2023-02-23
Supplement: fig2-data3 [file Figure2C-Spontaneous rate.xls]

## Sheet: ForFigure
	Mean	SEM	Mean	SEM
	bpm	bpm	bpm	bpm
	Sedentary (n=11)	Sedentary (n=11)	Trained (n=12)	Trained (n=12)
Sedentary	88.8297	8.0795
Trained			64.1888	8.1721

## Sheet: Frequency
Sedentary frequency	Trained frequency
bpm	bpm
102.006	84.1593
87.1249	76.3974
74.5156	89.0648
100.368	104.822
56.4104	50.6628
116.83	99.3926
51.6559	32.0091
59.8782	28.2983
95.7803	49.7361
	25.6575
93.3029	81.7179
139.254	48.3481

## Sheet: DescStatsQuantities1
Data	N total	Mean	SE of mean	Lower 95% CI of Mean	Upper 95% CI of Mean
		bpm	bpm	bpm	bpm
Descriptive Statistics	Descriptive Statistics	Descriptive Statistics	Descriptive Statistics	Descriptive Statistics	Descriptive Statistics
[SinusNodeFreq]Frequency
Sedentary frequency	11	88.8297	8.0795	70.8275	106.832
Trained frequency	12	64.1888	8.1721	46.2021	82.1755
