# Supplementary material for: Cardiac electrophysiological remodeling associated with enhanced arrhythmia susceptibility in a canine model of elite exercise
Source: eLife journal article supplement (doi:10.7554/elife.80710), 2023-02-23
Supplement: fig3-data1 [file Figure3B-Ventricular ES.xls]

## Sheet: Sheet1
	Ventricular ES	No ventricular ES
	number of dogs	number of dogs
Sedentary vs. trained
SED	2	10
TRN	6	6
