# Supplementary material for: Cardiac electrophysiological remodeling associated with enhanced arrhythmia susceptibility in a canine model of elite exercise
Source: eLife journal article supplement (doi:10.7554/elife.80710), 2023-02-23
Supplement: fig3-data2 [file Figure3C-Number of ES.xls]

## Sheet: Sheet1
Sedentary	Sedentary	Trained	Trained
Escape	Premature	Escape	Premature
0	0	0	0
0	0	0	0
0	1	4	2
0	0	246	0
0	0	6	0
0	0	16	8
0	0	29	0
0	0	55	0
0	3	0	0
0	0	0	0
0	0	0	0
0	0	0	0

## Sheet: DescStatsQuantities1
Data	N total	Mean	SE of mean
Descriptive Statistics	Descriptive Statistics	Descriptive Statistics	Descriptive Statistics
[NumberOfES1]Sheet1
Sedentary Escape	12	0	0
Sedentary Premature	12	0.333333	0.256235
Trained Escape	12	29.6667	20.2501
Trained Premature	12	0.833333	0.672324
