# Supplementary material for: Cardiac electrophysiological remodeling associated with enhanced arrhythmia susceptibility in a canine model of elite exercise
Source: eLife journal article supplement (doi:10.7554/elife.80710), 2023-02-23
Supplement: fig4-data1 [file Figure4B-APD90 tissue.xls]

## Sheet: Sheet1
	Sedentary	Sedentary	Trained	Trained
	ms	ms	ms	ms
tissue APD90	n=48	SEM	n=51	SEM
SED	221.7	5.4
TRN			226.5	4.1

## Sheet: Sheet2
Files	Sed. APD90	Files	Trained APD90
	ms		ms
Sedentary dogs	Sedentary dogs	Trained dogs	Trained dogs
200629AN.A13	236.6	200723AL.A29	225.9
200714AN.A08	230	200701AN.A09	224.2
200716AN.A08	209	200723AN.A07	264.3
200721AN.A08	240.5	200731AL.A35	235.1
200727AL.A20	209.6	200803AL.A32	205
200728AL.A06	231.7	200730AN.A08	219.6
200721AN.A08	240.5	200731AN.A08	224.8
200727AN.A08	260.3	200803AN.A07	226
200629AL.A09	249.5	200805AN.A07	229.1
200715AL.A09	241.2	200701AL.A22	217.4
200716AL.A04	225.7	200701AN.A32	222.6
200716AL.A17	191.3	200723BL.A21	224.5
200630AN.A07	230.1	200723AN.A25	254.7
200714AN.A28	224	200729AL.A23	247.8
200716AN.A28	193	200731AL.A20	222.1
200721BL.A29	251.4	200803AL.A18	200.6
200721AN.A27	250.1	200729AN.A07	258.8
200721AN.A27	250.1	200731AN.A30	227.3
200727AN.A46	226.8	200803AN.A23	212.8
200225AL.A02	235.5	200227AL.A02	273.6
200225AL.A22	215.7	200227AL.A21	222.8
200305AL.A01	292.1	200303AL.A01	279.1
200305AL.A29	209.3	200303AL.A20	204
200309AL.A01	213.3	200311AL.A01	202.4
200309AL.A31	155.3	200313AL.A37	223.8
200319AL.A01	152.1	200316AL.A02	232.9
200224AH.016	225.9	200316AL.A11	202.2
200224AH.003	192.4	200317AL.A19	215.8
200305AH.001	257.9	200317AL.A35	212.3
200309AH.007	205.7	200227AH.005	194.2
200309AH.001	238.6	200303AH.012	174.8
200318AH.021	184.8	200303AH.02	212.9
200318AH.007	222.2	200311AH.008	244.3
200319AH.015	125.7	200313AH.018	283.3
200319AH.001	239.4	200313AH.003	263.7
200320AH.039	142.3	200316AH.004	240.4
200320AH.014	217.6	200317AH.005	238.3
200224AH.024	279.7	200227AH.014	197.1
200224AH.024	279.7	200303AH.006	236.5
200318AH.014	211.1	200311AH.019	168.5
200319AH.008	129.4	200311AH.013	185
200320AH.030	185.5	200313AH.013	216.6
200225AN.A04	268.5	200316AH.017	181
200226AN.A01	214.4	200317AH.011	210.5
200305AN.A17	250.8	200227AN.A01	268.9
200305AN.A35	281.4	200227AN.A45	220
200309AN.A01	220.7	200303AN.A01	267.2
200309AN.A53	205.2	200304AN.A05	174.3
		200303AN.A62	241
		200311AN.A15	209.3
		200313AN.A09	309.7

## Sheet: DescStatsQuantities1
Data	N total	Mean	SE of mean	Lower 95% CI of Mean	Upper 95% CI of Mean
		ms	ms	ms	ms
Descriptive Statistics	Descriptive Statistics	Descriptive Statistics	Descriptive Statistics	Descriptive Statistics	Descriptive Statistics
[APDtissueDog]Sheet2
Sed. APD90	48	221.742	5.43366	210.811	232.673
Trained APD90	51	226.451	4.13624	218.143	234.759
