# Supplementary material for: Cardiac electrophysiological remodeling associated with enhanced arrhythmia susceptibility in a canine model of elite exercise
Source: eLife journal article supplement (doi:10.7554/elife.80710), 2023-02-23
Supplement: fig4-data2 [file Figure4C-APD90 single cell.xls]

## Sheet: Sheet1
	Sedentary	Sedentary	Trained	Trained
	ms	ms	ms	ms
APD90	n=25	SEM	n=29	SEM
SED	370.088	32.6888
TRN			472.818	29.5618

## Sheet: Sheet2
EXP	Sed. APD90	EXP	Trained APD90
	ms		ms
Sedentary dogs	Sedentary dogs	Trained dogs	Trained dogs
EXP1	178.6	EXP1	483.308
EXP2	361.4	EXP2	277.266
EXP3	135.4	EXP3	462.577
EXP4	116.906	EXP4	477.174
EXP5	242.174	EXP5	653.595
EXP6	445.255	EXP6	342.2
EXP8	459.6	EXP7	266.763
EXP9	509.515	EXP9	696.895
EXP10	372.1	EXP10	434.25
EXP11	122	EXP11	458.091
EXP12	215.681	EXP12	216.719
EXP13	211.761	EXP13	333.184
EXP14	368.68	EXP14	284.4
EXP15	253.935	EXP16	638.429
EXP16	377.705	EXP17	625.069
EXP17	664.378	EXP18	657.793
EXP18	571.591	EXP19	284.913
EXP19	497.13	EXP21	704.559
EXP20	418.607	EXP22	623.451
EXP21	499.536	EXP23	542.844
EXP22	226.124	EXP24	469.792
EXP23	367.939	EXP25	420.041
EXP24	617.1	EXP26	687.8
EXP25	629.2	EXP27	681.9
EXP26	389.878	EXP28	568.517
		EXP29	502.6
		EXP30	393.054
		EXP31	322.263
		EXP32	202.263

## Sheet: DescStatsQuantities1
Data	N total	Mean	SE of mean	Lower 95% CI of Mean	Upper 95% CI of Mean
		ms	ms	ms	ms
Descriptive Statistics	Descriptive Statistics	Descriptive Statistics	Descriptive Statistics	Descriptive Statistics	Descriptive Statistics
[APDsingleDog]Sheet2
Sed. APD90	25	370.088	32.6888	302.621	437.554
Trained APD90	29	472.818	29.5618	412.263	533.372
