# Supplementary material for: Cardiac electrophysiological remodeling associated with enhanced arrhythmia susceptibility in a canine model of elite exercise
Source: eLife journal article supplement (doi:10.7554/elife.80710), 2023-02-23
Supplement: fig4-data3 [file Figure4E-APD variability.xls]

## Sheet: Sheet1
	Sedentary	Sedentary	Trained	Trained
	ms	ms	ms	ms
STV of APD90	n=18	SEM	n=27	SEM
SED	17.541	4.01953
TRN			29.4698	3.8333

## Sheet: Sheet2
EXP	Sed. APD90var	EXP	Tr. APD90var
	ms		ms
Sedentary dogs	Sedentary dogs	Trained dogs	Trained dogs
EXP1		EXP1	18.5789
EXP2		EXP2	9.96705
EXP3		EXP3	9.90758
EXP4	2.37369	EXP4	48.1214
EXP5	5.83181	EXP5	27.476
EXP6	14.9612	EXP6	24.7499
EXP8		EXP7	4.75437
EXP9	31.0463	EXP9	56.6659
EXP10		EXP10	21.4347
EXP11		EXP11	49.3592
EXP12	6.81099	EXP12	10.0998
EXP13	7.62262	EXP13	11.4582
EXP14	7.64604	EXP14	10.4358
EXP15	14.6768	EXP16	63.0417
EXP16		EXP17	37.5232
EXP17	78.6677	EXP18	68.8455
EXP18	20.5212	EXP19	23.8576
EXP19	19.0308	EXP21	56.3924
EXP20	15.5948	EXP22	44.3034
EXP21	20.9254	EXP23	29.5341
EXP22	8.86153	EXP24	16.0546
EXP23	8.67614	EXP25	24.2301
EXP24	25.8779	EXP26	55.6664
EXP25	18.1025	EXP27
EXP26	8.51044	EXP28	46.2935
		EXP29
		EXP30	12.8354
		EXP31	9.22046
		EXP32	4.87671

## Sheet: DescStatsQuantities1
Data	N total	Mean	SE of mean	Lower 95% CI of Mean	Upper 95% CI of Mean
		ms	ms	ms	ms
Descriptive Statistics	Descriptive Statistics	Descriptive Statistics	Descriptive Statistics	Descriptive Statistics	Descriptive Statistics
[STVsingleDog]Sheet2
Sed. APD90var	18	17.541	4.01953	9.06052	26.0215
Tr. APD90var	27	29.4698	3.8333	21.5903	37.3492
