# Supplementary material for: Cardiac electrophysiological remodeling associated with enhanced arrhythmia susceptibility in a canine model of elite exercise
Source: eLife journal article supplement (doi:10.7554/elife.80710), 2023-02-23
Supplement: fig5-data3 [file Figure5C-INCX.xls]

## Sheet: Sheet1
	Sedentary	SEMsed	Trained	SEMtr
	pA/pF	pA/pF	pA/pF	pA/pF
20 mV	1.161	0.088	1.18	0.076
-80 mV	-0.599	0.044	-0.672	0.059

## Sheet: Sedentary
File	Amplitude at 20 mV	Amplitude at -80 mV
	pA/pF	pA/pF
R0225209	0.648419	-0.390588
R0225305	0.82887	-0.595973
R0225503	0.869777	-0.460206
R0225603	0.844752	-0.476487
L0309702	0.430337	-0.366763
L0309802	0.527409	-0.15793
R0309502	0.313512	-0.0776924
R0309603	0.202125	-0.0514404
R0309702	0.722294	-0.465305
L0319301	1.20577	-0.739917
L0319311	0.729197	-0.491983
R0319106	0.941877	-0.847251
L0320302	0.998077	-0.626061
L0629-011	1.62885	-0.715192
L0629-021	1.471	-0.673865
L0629-031	1.42069	-0.639383
L0629-042	1.74726	-0.809951
L0714-021	1.92757	-1.10347
L0714-041	1.47075	-0.73088
L0714-051	1.52803	-0.725885
L0716-001	1.74393	-0.839754
L0716-012	1.10876	-0.52521
L0717-102	1.83374	-0.907611
L0717-132	0.949083	-0.410278
L0721-001	1.51544	-0.711716
L0721-011	1.22921	-0.525081
L0721-021	1.30594	-0.624447
L0727-012	1.83978	-0.948761
L0727-021	1.38275	-0.642852
L0727-031	1.47225	-0.699588

## Sheet: Trained
File	Amplitude at 20 mV	Amplitude at -80 mV
	pA/pF	pA/pF
R0227204	0.26039	-0.240995
R0227303	0.241151	-0.296666
R0228104	0.233231	-0.216621
L0303602	1.12141	-0.597312
L0303703	1.06372	-0.560491
P2303902	1.04082	-0.552956
L0311003	1.36128	-0.746731
L0311103	0.965228	-0.309326
L0311202	0.831104	-0.581881
R0311206	1.05021	-0.891355
L0313002	1.05885	-0.782633
L0313102	0.900257	-0.42764
L0313302	1.12919	-0.660847
L0316104	1.12864	-0.683899
L0316204	1.31188	-0.923739
L0317602	1.03337	-0.731793
R0317206	1.87239	-2.13374
R0317302	0.969867	-0.444079
R0317402	0.530159	-0.276088
R0318104	0.676715
L0701-021	1.75975	-0.88345
L0701-041	1.25105	-0.609145
L0701-051	0.916642	-0.247528
L0701-071	1.3173	-0.595758
L0723-001	1.16086	-0.494346
L0723-012	1.90145	-0.974061
L0723-021	2.31587	-1.40234
L0729-021	2.05458	-1.23658
L0729-031	1.20621	-0.583598
L0729-051	1.52381	-0.825386
L0731-001	1.27386	-0.573931
L0731-011	1.71008	-1.02104
L0731-021	1.38453	-0.580617
L0803-001	0.886753	-0.386606
L0803-031	2.08387	-1.07389
L0803-041	1.6933	-0.820891
L0805-003	1.11797	-0.465963
L0805-011	1.20024	-0.535461
R0701109	0.779184	-0.310235
R0701203	0.902115	-0.545549

## Sheet: DescStatsQuantities1
Data	N total	Mean	SE of mean	Lower 95% CI of Mean	Upper 95% CI of Mean
		pA/pF	pA/pF	pA/pF	pA/pF
Descriptive Statistics	Descriptive Statistics	Descriptive Statistics	Descriptive Statistics	Descriptive Statistics	Descriptive Statistics
[INCXver2]Sedentary
Amplitude at 20 mV	30	1.16125	0.0879449	0.98138	1.34112
Amplitude at -80 mV	30	-0.599384	0.0443341	-0.690057	-0.508711

## Sheet: DescStatsQuantities2
Data	N total	Mean	SE of mean	Lower 95% CI of Mean	Upper 95% CI of Mean
		pA/pF	pA/pF	pA/pF	pA/pF
Descriptive Statistics	Descriptive Statistics	Descriptive Statistics	Descriptive Statistics	Descriptive Statistics	Descriptive Statistics
[INCXver2]Trained
Amplitude at 20 mV	40	1.18048	0.0762838	1.02618	1.33478
Amplitude at -80 mV	39	-0.67244	0.0586505	-0.791172	-0.553708
