# Supplementary material for: Cardiac electrophysiological remodeling associated with enhanced arrhythmia susceptibility in a canine model of elite exercise
Source: eLife journal article supplement (doi:10.7554/elife.80710), 2023-02-23
Supplement: fig5-data4 [file Figure5D-ICaLIV.xls]

## Sheet: Sheet1
	Sedentary	SEMsed	Trained	SEMtr
mV	pA/pF	pA/pF	pA/pF	pA/pF
	n=47		n=48
-35	-0.21	0.01	-0.21	0.01
-30	-0.34	0.02	-0.33	0.03
-25	-0.52	0.05	-0.47	0.04
-20	-0.88	0.08	-0.77	0.06
-15	-1.68	0.12	-1.46	0.1
-10	-2.84	0.14	-2.53	0.14
-5	-3.98	0.16	-3.66	0.16
0	-4.66	0.18	-4.48	0.17
5	-4.84	0.19	-4.77	0.18
10	-4.64	0.19	-4.64	0.17
15	-4.19	0.18	-4.24	0.16
20	-3.57	0.16	-3.7	0.15
25	-2.94	0.14	-3.1	0.13
30	-2.33	0.11	-2.49	0.11
35	-1.76	0.09	-1.92	0.09
40	-1.3	0.07	-1.43	0.08
45	-0.92	0.05	-1.02	0.06
50	-0.6	0.04	-0.71	0.05
55	-0.37	0.03	-0.45	0.03

## Sheet: Sedentary
Potential	L0225-006	L0225-102	L0225-202	L0305-002	L0305-104	L0305-202	L0309-202	L0309-302	L0309-402	L0318-511	L0318-604	L0318-702	L0318806	L0320-201	P2320502	P2320507	R0226107	R0226202	R0309302	R0319204	R0319405	R0319502	R0319702	M0305302	M0305502	L0629-112	L0629-132	L0715-102	L0716-102	L0716-132	L0717-202	L0721-122	L0722-002	L0722-023	L0722-042	L0727-102	L0727-122	L0728-123	L0807-102	L0807-122	L0807-132	L0807-163	R0629123	R0714107	R0717110	R0721106	P2715-502	N total	Mean
mV	pA/pF	pA/pF	pA/pF	pA/pF	pA/pF	pA/pF	pA/pF	pA/pF	pA/pF	pA/pF	pA/pF	pA/pF	pA/pF	pA/pF	pA/pF	pA/pF	pA/pF	pA/pF	pA/pF	pA/pF	pA/pF	pA/pF	pA/pF	pA/pF	pA/pF	pA/pF	pA/pF	pA/pF	pA/pF	pA/pF	pA/pF	pA/pF	pA/pF	pA/pF	pA/pF	pA/pF	pA/pF	pA/pF	pA/pF	pA/pF	pA/pF	pA/pF	pA/pF	pA/pF	pA/pF	pA/pF	pA/pF		pA/pF
																																																Statistics On Rows of B"L0225-006":C51"P2715-502"	Statistics On Rows of B"L0225-006":C51"P2715-502"
-35	-0.124604	-0.0728543	-0.263338	-0.132922	-0.155376	-0.143604	-0.0873784	-0.095491	-0.191321	-0.225133	-0.102205	-0.216286	-0.31408	-0.2166	-0.360671	-0.291215	-0.235793	-0.236694	-0.331621	-0.141749	-0.393461	-0.299438	-0.193729	-0.193162	-0.0903267	-0.157158	-0.216023	-0.148663	-0.185077	-0.157482	-0.1538	-0.298599	-0.232089	-0.232293	-0.249711	-0.293234	-0.312092	-0.0919268	-0.180025	-0.152931	-0.16211	-0.365254	-0.330094	-0.241044	-0.0315504	-0.281907	-0.133358	47	-0.206712
-30	-0.19316	-0.10095	-0.279428	-0.256297	-0.297606	-0.185409	-0.0593536	-0.204088	-0.309163	-0.277878	-0.194004	-0.316959	-0.373456	-0.322956	-0.454556	-0.37392	-0.275881	-0.250161	-0.808912	-0.18057	-0.789717	-0.513556	-0.378696	-0.291755	-0.193052	-0.322976	-0.323092	-0.2245	-0.396543	-0.285137	-0.207797	-0.305833	-0.363028	-0.207776	-0.337945	-0.358462	-0.477536	-0.199947	-0.307201	-0.25981	-0.380949	-0.901331	-0.587133	-0.594328	-0.268219	-0.495885	-0.267939	47	-0.339465
-25	-0.344382	-0.168105	-0.44374	-0.80002	-0.365434	-0.426634	-0.0944283	-0.28283	-0.730933	-0.425387	-0.27024	-0.434194	-0.685396	-0.343581	-0.489375	-0.429628	-0.288137	-0.249235	-1.15964	-0.239318	-1.23825	-0.755761	-0.343344	-0.387373	-0.174393	-0.402223	-0.41814	-0.546449	-0.35106	-0.432533	-0.370528	-0.40015	-0.446326	-0.354076	-0.512861	-0.535908	-0.555908	-0.375443	-0.456813	-0.370059	-0.417806	-1.67174	-1.36543	-1.22157	-0.559758	-0.526048	-0.397386	47	-0.516127
-20	-0.962114	-0.512736	-1.50645	-2.14041	-0.697035	-1.11504	-0.306144	-0.496112	-1.65607	-0.51664	-0.531045	-0.590149	-1.28426	-0.544256	-0.583875	-0.549284	-0.669668	-0.570754	-1.54891	-0.27258	-1.75264	-0.834024	-0.39926	-0.467666	-0.587977	-0.546813	-0.606657	-1.05177	-0.553372	-0.616238	-0.686119	-0.829599	-0.617678	-0.789894	-0.703971	-0.980692	-0.677732	-0.849722	-0.629268	-0.621833	-0.667261	-2.08514	-2.53637	-1.94832	-0.931343	-0.880295	-0.480139	47	-0.880539
-15	-2.31556	-1.50796	-3.40843	-4.23917	-1.71174	-2.79913	-0.718106	-1.07346	-2.63017	-0.728171	-1.43465	-0.927158	-2.19321	-1.03576	-1.06124	-1.15534	-1.69407	-1.33398	-1.92147	-0.587264	-2.81218	-1.22603	-0.790005	-0.706563	-1.94844	-0.994486	-1.31697	-1.92176	-1.15945	-1.11099	-1.31436	-1.45474	-1.17525	-1.78615	-1.30597	-2.01879	-1.47183	-1.68821	-1.59856	-1.69628	-1.55047	-2.17372	-3.77318	-2.65019	-1.94257	-1.71557	-1.41365	47	-1.68495
-10	-4.39623	-2.85735	-5.13485	-5.91571	-3.0628	-4.7438	-1.81429	-2.11058	-3.57519	-1.1412	-2.08127	-1.61334	-3.17088	-1.83292	-2.12499	-1.85722	-3.41475	-2.779	-2.73175	-1.8367	-3.98496	-2.08075	-1.96477	-1.96804	-4.36879	-1.9437	-2.52376	-2.85392	-2.18939	-2.17724	-2.17205	-2.77763	-2.05891	-2.82072	-2.17951	-3.28548	-3.03328	-2.66176	-3.13885	-3.33023	-2.7551	-2.59416	-4.47904	-2.82898	-2.9822	-3.16115	-3.06908	47	-2.84209
-5	-5.61417	-3.89806	-6.39333	-6.97159	-4.08497	-5.88806	-3.01344	-2.83397	-4.20226	-1.67133	-3.08115	-2.37203	-3.78484	-2.69293	-3.8273	-2.65159	-4.83622	-4.36385	-3.64115	-3.30071	-5.5994	-3.36162	-3.5495	-3.3209	-6.41578	-2.99384	-3.94195	-3.55485	-3.27532	-3.30479	-2.93112	-4.01494	-2.99385	-4.12922	-2.8495	-4.44807	-4.55265	-3.3334	-4.25385	-5.00841	-4.37694	-4.46167	-4.66801	-2.83784	-3.86682	-4.80936	-4.98433	47	-3.97789
0	-6.11712	-4.53596	-6.76212	-7.38297	-5.03737	-6.21238	-3.95264	-3.13952	-4.27624	-2.27302	-3.78338	-2.87971	-4.05538	-3.41806	-5.38912	-3.40832	-5.47496	-5.45055	-4.08031	-3.69708	-6.4676	-4.58453	-4.67528	-4.46602	-7.28748	-3.84983	-5.05298	-3.74104	-4.01971	-4.08373	-3.381	-4.49284	-3.47198	-4.82277	-3.42813	-5.02438	-5.49399	-3.59966	-4.75654	-5.93718	-5.46518	-6.10636	-4.3933	-2.67999	-4.15102	-5.94054	-6.1558	47	-4.65649
5	-6.02459	-4.64636	-6.65554	-7.27989	-5.54549	-5.93685	-4.31196	-3.15759	-4.02507	-2.58455	-4.0557	-3.15982	-3.83664	-3.71397	-6.14997	-3.61577	-5.65105	-5.86156	-4.11475	-3.53273	-6.60454	-5.30327	-5.01123	-4.96507	-7.28527	-4.33532	-5.41524	-3.57732	-4.52381	-4.36055	-3.58474	-4.47803	-3.71508	-4.97375	-3.67326	-5.14899	-6.02101	-3.67156	-4.58411	-6.2103	-5.88941	-7.29925	-3.9605	-2.27502	-3.7169	-6.4678	-6.77263	47	-4.84434
10	-5.68949	-4.3246	-6.14257	-6.65431	-5.8028	-5.31229	-4.07531	-2.84105	-3.6743	-2.82917	-3.87472	-3.15921	-3.46479	-3.70122	-6.31235	-3.61284	-5.33877	-5.7037	-3.87816	-3.12583	-6.25271	-5.33472	-5.01594	-5.08604	-6.66629	-4.39017	-5.59072	-3.27263	-4.50622	-4.20267	-3.31923	-4.22099	-3.39736	-4.66316	-3.64661	-4.7757	-5.673	-3.56189	-4.22286	-5.90344	-5.82387	-7.56701	-3.35263	-1.87837	-3.25663	-6.27856	-6.52882	47	-4.63629
15	-5.04619	-3.84002	-5.40132	-5.62186	-5.36644	-4.50299	-4.14934	-2.6823	-3.04637	-2.82212	-3.71585	-2.78287	-2.93814	-3.36752	-5.91232	-3.34225	-4.77313	-5.30011	-3.39399	-2.67004	-5.55073	-5.1302	-4.58516	-4.72363	-5.9191	-4.16408	-5.09235	-2.69292	-4.22095	-3.87986	-2.92568	-3.6185	-3.19572	-4.14289	-3.34351	-4.27964	-5.22807	-3.23402	-3.78189	-5.3849	-5.34776	-6.99435	-2.69726	-1.49846	-2.75796	-5.69173	-6.00912	47	-4.1865
20	-4.28554	-3.08891	-4.3734	-4.64052	-4.53687	-3.7326	-3.2273	-2.23965	-2.41081	-2.54086	-3.30205	-2.37361	-2.56477	-2.92788	-5.2782	-2.83781	-4.05427	-4.56765	-2.92301	-2.22288	-4.74608	-4.3984	-3.89155	-4.19227	-5.07425	-3.67592	-4.60927	-2.2013	-3.58333	-3.31196	-2.46261	-3.04099	-2.79321	-3.481	-2.92934	-3.66251	-4.62748	-2.78645	-3.33183	-4.5716	-4.72192	-6.27662	-2.14661	-1.12742	-2.10339	-4.94035	-5.16577	47	-3.57409
25	-3.57934	-2.57882	-3.50241	-3.64492	-3.7191	-2.87969	-2.86349	-1.86258	-1.86296	-2.23084	-2.60598	-2.02785	-2.08799	-2.50491	-4.60748	-2.39235	-3.3164	-3.78318	-2.33527	-1.77826	-4.01433	-3.65191	-3.11667	-3.497	-4.22644	-3.06996	-4.06007	-1.67918	-3.03454	-2.6573	-2.01264	-2.46511	-2.37073	-2.62175	-2.17991	-2.99585	-3.86977	-2.44368	-2.76285	-3.84708	-3.8541	-5.3861	-1.67435	-0.818481	-1.40282	-4.07993	-4.17034	47	-2.93887
30	-2.72638	-2.09464	-2.68443	-2.70265	-2.88967	-2.17601	-2.55826	-1.72236	-1.49176	-1.89187	-2.0202	-1.69455	-1.59509	-2.05425	-3.71306	-1.87608	-2.59996	-3.02947	-1.83931	-1.36607	-3.24113	-2.86345	-2.42725	-2.88322	-3.37285	-2.45548	-3.25629	-1.16418	-2.53029	-2.13787	-1.57759	-1.8921	-1.68611	-2.0631	-1.66215	-2.40461	-3.14544	-1.86953	-2.19304	-3.06895	-3.06708	-4.30411	-1.22667	-0.675314	-1.12993	-3.24095	-3.23004	47	-2.32968
35	-2.05345	-1.55344	-1.96941	-2.03014	-2.15565	-1.57727	-1.97169	-1.52813	-1.00024	-1.34679	-1.60488	-1.31152	-1.24422	-1.60328	-3.06695	-1.45292	-1.95189	-2.4173	-1.29061	-0.994323	-2.31461	-2.16674	-1.82075	-2.24567	-2.7636	-1.88005	-2.45556	-0.868001	-1.99258	-1.56888	-1.17626	-1.42986	-1.27065	-1.54295	-1.22768	-1.75512	-2.39219	-0.986616	-1.73306	-2.38279	-2.39745	-3.37944	-0.894827	-0.397232	-0.880588	-2.39081	-2.36889	47	-1.76185
40	-1.50981	-1.15799	-1.43744	-1.3964	-1.60825	-1.13041	-1.33383	-1.14249	-0.659463	-1.03822	-1.11498	-1.02049	-0.966063	-1.15702	-2.37575	-1.01491	-1.42968	-1.81565	-0.907694	-0.700809	-1.61791	-1.55519	-1.23893	-1.67361	-1.94795	-1.58612	-1.93707	-0.567328	-1.80937	-1.12913	-0.863791	-0.969303	-0.916763	-1.20951	-0.812545	-1.27149	-1.80406	-0.778415	-1.279	-1.74367	-1.67621	-2.48602	-0.611628	-0.40156	-0.534824	-1.79532	-1.73549	47	-1.2951
45	-1.2078	-0.706834	-0.980132	-1.06239	-1.22043	-0.679885	-0.906102	-0.935877	-0.381133	-0.682426	-0.832959	-0.746612	-0.658732	-0.799519	-1.74876	-0.685151	-1.03723	-1.37181	-0.552344	-0.450365	-1.08844	-1.04104	-0.9085	-1.21977	-1.43924	-1.11056	-1.48032	-0.468519	-1.17547	-0.826514	-0.584113	-0.675731	-0.657955	-0.799996	-0.615551	-0.952654	-1.25201	-0.6431	-0.893786	-1.24004	-1.18926	-1.73453	-0.401744	-0.331528	-0.348588	-1.30698	-1.17773	47	-0.919365
50	-0.865121	-0.450733	-0.661481	-0.7233	-0.856748	-0.353006	-0.401131	-0.602857	-0.243401	-0.437643	-0.481204	-0.533054	-0.458919	-0.606024	-1.23787	-0.410745	-0.681522	-0.901173	-0.261256	-0.345844	-0.674531	-0.636351	-0.646259	-0.86867	-1.0102	-0.721115	-0.770623	-0.519922	-0.899355	-0.433658	-0.397333	-0.426689	-0.385747	-0.524768	-0.368618	-0.584813	-0.797784	-0.306984	-0.606205	-0.854082	-0.793847	-1.13288	-0.246803	-0.246782	-0.363919	-0.845114	-0.789296	47	-0.603519
55	-0.658015	-0.187545	-0.390089	-0.402016	-0.551573	-0.14283	-0.193184	-0.374928	-0.158978	-0.170454	-0.272431	-0.282131	-0.141312	-0.321311	-0.78436	-0.192305	-0.401225	-0.616182	-0.0882056	-0.176714	-0.457318	-0.396642	-0.45907	-0.620023	-0.692949	-0.464466	-0.435306	-0.532725	-0.519975	-0.256934	-0.341853	-0.187033	-0.201156	-0.29802	-0.0858065	-0.248873	-0.455526	-0.280102	-0.380818	-0.485189	-0.478574	-0.731309	-0.224492	-0.151048	-0.349937	-0.500296	-0.598878	47	-0.368938
[truncated: 1 more columns]

## Sheet: Trained
Potential	L0227-002	L0227-107	L0227-206	L0227-305	L0303-005	P2303702	P2303802	L0304-002	L0304-102	L0304-203	P2311910	P2311921	L0316-503	L0316-602	L0316-702	L0317-704	L0318-012	L0318-022	R0227103	R0311305	R0313303	R0314109	M0304202	M0304302	M0304402	L0702-002	L0702-012	L0702-023	L0702-202	L0723-112	L0723-133	L0723-153	L0723-182	L0729-102	L0729-122	L0729-142	L0731-202	L0801-002	L0801-017	L0803-102	L0803-122	L0803-152	L0803-174	R0701412	P2731-602	P2731-702	P2803-510	M0806-302	N total
mV	pA/pF	pA/pF	pA/pF	pA/pF	pA/pF	pA/pF	pA/pF	pA/pF	pA/pF	pA/pF	pA/pF	pA/pF	pA/pF	pA/pF	pA/pF	pA/pF	pA/pF	pA/pF	pA/pF	pA/pF	pA/pF	pA/pF	pA/pF	pA/pF	pA/pF	pA/pF	pA/pF	pA/pF	pA/pF	pA/pF	pA/pF	pA/pF	pA/pF	pA/pF	pA/pF	pA/pF	pA/pF	pA/pF	pA/pF	pA/pF	pA/pF	pA/pF	pA/pF	pA/pF	pA/pF	pA/pF	pA/pF	pA/pF
																																																	Statistics On Rows of B"L0227-002":D5"M0806-302"
-35	-0.143002	-0.138811	-0.062946	-0.119385	-0.180424	-0.0879062	-0.121276	-0.134494	-0.172498	-0.128537	-0.150669	-0.200364	-0.265228	-0.145122	-0.19566	-0.235719	-0.171969	-0.239814	-0.296053	-0.263204	-0.316563	-0.334912	-0.217568	-0.198214	-0.243372	-0.113194	-0.173668	-0.0462367	-0.0446843	-0.393733	-0.265428	-0.297143	-0.171229	-0.269844	-0.207663	-0.41495	-0.417006	-0.151041	-0.208827	-0.201019	-0.284146	-0.312843	-0.0955335	-0.138182	-0.377338	-0.230501	-0.160322	-0.271811	48
-30	-0.156112	-0.191132	-0.0415152	-0.162599	-0.242956	-0.104342	-0.206068	-0.217751	-0.237889	-0.20197	-0.27242	-0.302213	-0.625597	-0.253416	-0.300429	-0.319973	-0.201324	-0.275429	-0.838217	-0.426715	-0.604339	-0.434989	-0.285798	-0.364682	-0.346709	-0.146922	-0.247321	-0.215896	-0.0856523	-0.469081	-0.278911	-0.414777	-0.214429	-0.419092	-0.259464	-0.805209	-0.780179	-0.282707	-0.257416	-0.265576	-0.68042	-0.624723	-0.138686	-0.17381	-0.565731	-0.309371	-0.184836	-0.169048	48
-25	-0.167065	-0.385012	-0.104312	-0.238744	-0.321219	-0.210555	-0.370334	-0.241108	-0.256398	-0.23263	-0.300166	-0.404067	-0.946247	-0.370389	-0.283489	-0.485705	-0.383984	-0.47195	-1.50593	-0.5781	-0.518703	-0.544092	-0.363644	-0.520082	-0.432357	-0.169479	-0.410781	-0.30478	-0.204284	-0.515357	-0.485647	-0.548931	-0.56088	-0.448865	-0.396436	-1.45316	-1.04215	-0.439506	-0.611599	-0.289378	-1.27452	-0.681592	-0.181375	-0.286184	-0.790251	-0.434922	-0.238198	-0.351225	48
-20	-0.489372	-1.17123	-0.289278	-0.657764	-0.675161	-0.405462	-0.429964	-0.27453	-0.380434	-0.331625	-0.382973	-0.668195	-1.29507	-0.696997	-0.452678	-0.555622	-0.851325	-1.03611	-2.18042	-0.776508	-0.893847	-0.867742	-0.478873	-0.859101	-0.706634	-0.202372	-0.520099	-0.293486	-0.482415	-0.623886	-1.11875	-0.809447	-1.31766	-0.84145	-0.918066	-1.79629	-1.18465	-1.01634	-1.2247	-0.433109	-1.23561	-0.888952	-0.367472	-0.563559	-1.30267	-0.866774	-0.301262	-1.08064	48
-15	-1.27988	-2.61609	-0.881674	-1.51958	-2.03267	-0.68385	-0.726033	-0.446983	-0.8418	-0.569745	-0.638421	-1.56588	-2.14434	-1.77825	-0.939622	-0.822724	-1.84754	-2.17046	-2.72337	-1.26414	-1.08416	-2.10155	-1.09247	-1.75392	-1.44076	-0.315679	-0.832901	-0.865299	-0.985191	-1.02709	-2.79094	-1.4289	-2.83751	-1.58845	-2.05717	-1.92791	-1.37853	-2.0437	-2.17461	-1.21851	-1.31697	-1.22035	-0.780751	-1.12562	-2.56801	-1.69717	-0.691184	-2.12077	48
-10	-2.62736	-4.03454	-1.93741	-2.43744	-4.15102	-1.40717	-1.52961	-1.05396	-1.82218	-0.956635	-1.64578	-2.62989	-3.58652	-2.99089	-1.75593	-1.61004	-2.96634	-3.18329	-3.19662	-2.2095	-1.62576	-3.25637	-2.36147	-2.81982	-2.45146	-0.622197	-1.58695	-1.97754	-1.61891	-2.11027	-5.10977	-2.45644	-4.81755	-2.7509	-3.8496	-2.5311	-2.30764	-3.29041	-2.90841	-2.79564	-1.62768	-2.34297	-1.80409	-1.91319	-4.29467	-3.17037	-1.72252	-3.43078	48
-5	-3.66333	-4.96091	-3.16467	-3.34319	-5.326	-2.38997	-2.55947	-2.0587	-2.89037	-1.9954	-2.88236	-3.97397	-4.77936	-4.58193	-2.86123	-2.46767	-3.76229	-3.92861	-3.87706	-3.44565	-3.27711	-4.37156	-3.58863	-3.79647	-3.80028	-1.11366	-2.37766	-3.1825	-2.36358	-3.31038	-7.43331	-3.54315	-6.263	-3.8402	-5.03318	-4.0538	-3.54756	-4.14019	-3.28391	-4.48754	-3.23985	-3.55273	-3.00074	-2.46877	-5.76371	-4.33882	-3.24712	-4.44195	48
0	-4.31893	-5.04556	-4.07688	-3.8085	-5.69217	-3.07592	-3.31504	-3.04384	-3.9328	-2.92872	-4.18293	-4.95379	-5.48215	-5.70622	-3.57803	-3.45546	-4.06528	-4.1192	-4.52697	-4.18935	-4.47735	-4.65311	-4.53499	-4.56478	-4.64673	-1.75866	-3.2061	-3.97965	-2.59373	-4.27745	-9.01364	-4.37107	-6.78134	-4.80863	-5.49082	-5.33488	-4.23329	-4.62831	-4.23092	-5.89509	-5.46065	-4.71515	-4.21039	-2.8105	-6.38688	-5.04459	-4.64141	-4.82993	48
5	-4.3924	-4.7145	-4.23851	-3.91098	-5.59341	-3.38654	-3.63819	-4.00552	-4.21672	-3.60682	-4.72308	-5.30848	-5.56995	-6.12038	-3.9736	-4.08759	-3.96623	-3.97249	-4.82936	-4.44256	-5.04081	-4.73289	-4.56101	-4.85098	-5.03287	-2.1888	-3.55444	-4.19454	-2.68041	-4.584	-9.37782	-4.62153	-6.67112	-5.06451	-5.79864	-6.09176	-4.6659	-4.41892	-4.06959	-6.84205	-6.74538	-5.30599	-4.72784	-2.79287	-6.48275	-5.31622	-5.35215	-4.65634	48
10	-3.6311	-4.28784	-4.0536	-3.68089	-4.67885	-3.44786	-3.56088	-4.4048	-4.16774	-4.0412	-4.69864	-5.18129	-5.2133	-5.94859	-3.9153	-4.27496	-3.69807	-3.61156	-4.71594	-4.32702	-5.12765	-4.43856	-4.43049	-4.67207	-4.9232	-2.45475	-3.65681	-4.1995	-2.49017	-4.60294	-8.91492	-4.52794	-6.1125	-4.84717	-5.29079	-6.17955	-4.60834	-4.0833	-3.72315	-6.95137	-7.23261	-5.47908	-4.64719	-2.59953	-6.08989	-4.99949	-5.47568	-4.27886	48
15	-3.19721	-3.61784	-3.70968	-3.33745	-3.83384	-3.16388	-3.34281	-4.3544	-3.81041	-4.14248	-4.45522	-4.71465	-4.6397	-5.41411	-3.59943	-4.18455	-3.29115	-3.18693	-4.38893	-3.97619	-4.85887	-3.964	-3.80081	-4.17452	-4.41215	-2.45752	-3.3222	-3.90389	-2.16493	-4.29315	-8.07735	-4.03715	-5.1645	-4.27202	-4.44608	-5.8629	-4.3457	-3.56049	-3.31302	-6.43466	-7.07527	-5.16575	-4.39852	-2.27528	-5.46049	-4.46252	-5.53145	-3.68932	48
20	-2.76924	-2.95871	-3.20993	-2.71498	-3.48165	-2.8766	-3.02996	-4.23991	-3.37428	-3.78784	-3.97044	-4.225	-3.98938	-4.73037	-3.15836	-3.87165	-2.76121	-2.75888	-3.98873	-3.46841	-4.35874	-3.35704	-3.22845	-3.57964	-3.79608	-2.07879	-3.06157	-3.53397	-1.76084	-3.63909	-6.83892	-3.49285	-4.21575	-3.68764	-3.67566	-5.15928	-3.98691	-3.06379	-2.76087	-5.76184	-6.34249	-4.60494	-3.99901	-1.76614	-4.73203	-3.79165	-4.92799	-3.08864	48
25	-2.45382	-2.31025	-2.7409	-2.18036	-3.17844	-2.40615	-2.55814	-3.78191	-2.79219	-3.11189	-3.41911	-3.44625	-3.46944	-3.93283	-2.66957	-3.35242	-2.29931	-2.20008	-3.50878	-2.73588	-3.73805	-2.71695	-2.62323	-3.14177	-3.13536	-1.7029	-2.55872	-3.04747	-1.31563	-3.1075	-5.51551	-2.78962	-3.20201	-3.00776	-3.04936	-4.35283	-3.40897	-2.42469	-2.2792	-4.88509	-5.61763	-3.80789	-3.27385	-1.52956	-3.93336	-3.20787	-4.26067	-2.50386	48
30	-2.05491	-1.76386	-2.27387	-1.64559	-2.64537	-1.9567	-2.10338	-3.25421	-2.29413	-2.64584	-2.7348	-2.72546	-2.8293	-3.19316	-2.10033	-2.8069	-1.85549	-1.75392	-2.88394	-2.19234	-3.0513	-2.04021	-2.06149	-2.51822	-2.4616	-1.2787	-2.06702	-2.52662	-0.87634	-2.61013	-4.35465	-2.18778	-2.43788	-2.23287	-2.55522	-3.51364	-2.79152	-1.87532	-1.53739	-4.01415	-4.59575	-3.1417	-2.83165	-1.11996	-3.25864	-2.48061	-3.52677	-1.73001	48
35	-1.59901	-1.32248	-1.79998	-1.16403	-2.30385	-1.39319	-1.6365	-2.64134	-1.87034	-2.17029	-2.21448	-2.09629	-2.21979	-2.51636	-1.80523	-2.08694	-1.44629	-1.34777	-2.25446	-1.67598	-2.36628	-1.39858	-1.54953	-1.82046	-1.81341	-0.854192	-1.51956	-2.07808	-0.494854	-1.89794	-3.27792	-1.66226	-1.73271	-1.66596	-1.99272	-2.77413	-2.26092	-1.28719	-1.01975	-3.09604	-3.63393	-2.42725	-2.1143	-0.838941	-2.60276	-2.121	-2.87601	-1.2514	48
40	-1.29723	-0.949338	-1.30404	-0.828447	-1.68624	-1.1098	-1.20043	-2.10555	-1.25371	-1.6933	-1.70408	-1.57991	-1.76592	-2.02683	-1.52534	-1.60618	-1.07396	-0.998738	-1.74398	-1.2263	-1.80105	-0.979284	-1.13477	-1.22157	-1.29345	-0.326058	-1.09508	-1.5766	-0.19802	-1.38161	-2.35076	-1.20151	-1.24223	-1.25722	-1.49717	-2.34639	-1.70193	-0.947071	-0.707855	-2.33235	-2.797	-1.78849	-1.65364	-0.588559	-1.9922	-1.37198	-2.2173	-0.870576	48
45	-1.11653	-0.682033	-0.838251	-0.554917	-1.27232	-0.783657	-0.876387	-1.69883	-0.890036	-1.29703	-1.27166	-1.12018	-1.19621	-1.47151	-1.0857	-1.27916	-0.772302	-0.670531	-1.20665	-0.863555	-1.26421	-0.623782	-0.809815	-0.953	-0.895538	-0.103537	-0.687402	-1.11838	-0.089758	-1.26441	-1.70547	-0.805239	-0.794819	-0.786445	-1.08486	-1.38082	-1.28259	-0.663809	-0.493618	-1.67891	-2.01654	-1.22582	-1.20292	-0.367595	-1.43501	-0.913092	-1.58252	-0.774342	48
50	-0.926899	-0.445669	-0.569244	-0.345447	-1.16511	-0.550039	-0.616373	-1.31109	-0.592167	-1.00186	-0.927536	-0.651603	-0.802568	-1.06868	-0.785232	-0.888822	-0.523697	-0.469709	-0.807682	-0.597465	-0.931542	-0.434675	-0.562002	-0.692255	-0.586939	0.0908067	-0.422508	-0.707243	-0.114949	-0.839169	-1.20648	-0.60917	-0.522285	-0.487669	-0.81059	-0.872106	-1.092	-0.340622	-0.254054	-1.22331	-1.40481	-0.821307	-0.85727	-0.20203	-1.01345	-0.793219	-1.07043	-0.280895	48
55	-0.676546	-0.258934	-0.390168	-0.184888	-0.869538	-0.385034	-0.37983	-0.941804	-0.389792	-0.6	-0.638151	-0.36677	-0.578727	-0.690062	-0.545154	-0.599781	-0.285485	-0.266826	-0.572752	-0.490417	-0.636584	-0.30778	-0.351113	-0.563261	-0.327233	0.0349746	-0.169242	-0.396233	-0.105491	-0.456561	-0.896601	-0.28444	-0.271922	-0.243847	-0.40501	-0.49379	-0.489307	-0.216344	-0.113442	-0.646078	-0.985986	-0.468434	-0.630212	-0.214913	-0.622398	-0.301811	-0.956633	-0.191616	48
[truncated: 2 more columns]
