# Supplementary material for: Cardiac electrophysiological remodeling associated with enhanced arrhythmia susceptibility in a canine model of elite exercise
Source: eLife journal article supplement (doi:10.7554/elife.80710), 2023-02-23
Supplement: fig5-data6 [file Figure5F-IKrIV.xls]

## Sheet: Sheet1
	Sedentary	SEMsed	Trained	SEMtr
mV	pA/pF	pA/pF	pA/pF	pA/pF
	n=43		n=60
-30	0.064	0.006	0.058	0.004
-20	0.078	0.007	0.07	0.005
-10	0.153	0.013	0.142	0.009
0	0.311	0.023	0.302	0.02
10	0.393	0.025	0.384	0.022
20	0.4	0.024	0.401	0.022
30	0.394	0.022	0.407	0.021
40	0.379	0.022	0.401	0.022
50	0.383	0.023	0.406	0.023

## Sheet: Sedentary
Potential	P2225-202	P2225-402	P2225-502	P2226-102	P2226-202	P2305-502	P2309-605	P2309-705	P2309-802	P2309-905	P2310-102	P2310-204	P2310-303	P2318-602	P2318-702	P2318-802	P2318-902	P2320-102	P2320-104	P2320-110	P2320-203	P2320-302	L0319-401	L0319-411	L0319-421	L0319-431	P2629-102	P2629-202	P2714-102	P2714-302	P2715-102	P2715-302	P2716-302	P2716-402	P2716-502	P2716-605	P2721-102	P2721-202	P2727-102	P2727-202	P2728-405	P2807-111	P2807-117	N total	Mean	SE of mean
mV	pA/pF	pA/pF	pA/pF	pA/pF	pA/pF	pA/pF	pA/pF	pA/pF	pA/pF	pA/pF	pA/pF	pA/pF	pA/pF	pA/pF	pA/pF	pA/pF	pA/pF	pA/pF	pA/pF	pA/pF	pA/pF	pA/pF	pA/pF	pA/pF	pA/pF	pA/pF	pA/pF	pA/pF	pA/pF	pA/pF	pA/pF	pA/pF	pA/pF	pA/pF	pA/pF	pA/pF	pA/pF	pA/pF	pA/pF	pA/pF	pA/pF	pA/pF	pA/pF		pA/pF	pA/pF
																																												Statistics On Rows of B"P2225-202":C53"P2807-117"	Statistics On Rows of B"P2225-202":C53"P2807-117"	Statistics On Rows of B"P2225-202":C53"P2807-117"
-30	0.0527486	0.0371353	0.0721316	0.0256885	0.0232538	0.0385641	0.059936	0.0659107	0.0573151	0.091469	0.0455714	0.0594047	0.0491987	0.0377597	0.123151	0.0358088	0.0584633	0.0628447	0.138853	0.0533184	0.0497487	0.0781632	0.042617	0.0429919	0.0482055	0.0678167	0.0943969	0.0722497	0.0592293	0.0523756	0.0667587	0.0481377	0.031735	0.0427114	0.0568915	0.0641531	0.0845066	0.0751725	0.0717234	0.0535855	0.266755	0.0433567	0.0499879	43	0.0639952	0.00594295
-20	0.0679203	0.0207464	0.0826795	0.0177558	0.0318061	0	0.0567362	0.113964	0.0925133	0.138623	0.0484459	0.0608203	0.075184	0.0499086	0.0396233	0.0439214	0.0646721	0.0447015	0.142705	0.0961816	0.0794193	0.0772742	0.0580523	0.0637868	0.0741778	0.0560162	0.0862384	0.0818367	0.0722284	0.0926002	0.0694524	0.106604	0.130449	0.0671332	0.0573985	0.0956017	0.155284	0.0719167	0.107374	0.0672184	0.27802	0.0671304	0.0636073	43	0.0783193	0.00684124
-10	0.0938854	0.0317287	0.109766	0.0397996	0.0386621	0.0264245	0.145218	0.306291	0.261874	0.332325	0.0746553	0.131815	0.100796	0.0994114	0.0932286	0.0604127	0.0618345	0.0836512	0.119713	0.204382	0.154179	0.228425	0.188149	0.0846618	0.182532	0.0728309	0.17628	0.186697	0.111259	0.216525	0.142945	0.274473	0.156559	0.135995	0.100051	0.254647	0.342072	0.125516	0.212313	0.129606	0.361919	0.124234	0.197901	43	0.152922	0.0131532
0	0.145054	0.0322026	0.149821	0.0567173	0.0407118	0.0913724	0.284559	0.509242	0.38255	0.491141	0.14036	0.355505	0.35361	0.137577	0.185842	0.151614	0.15092	0.260589	0.168623	0.429298	0.418216	0.489137	0.412499	0.26565	0.335693	0.142804	0.441718	0.494497	0.262399	0.398196	0.270372	0.34626	0.246562	0.311172	0.31049	0.564875	0.562253	0.29608	0.621613	0.437152	0.402249	0.365045	0.469467	43	0.311203	0.0234139
10	0.166089	0.0798379	0.157137	0.104781	0.0677822	0.226778	0.33086	0.548646	0.391653	0.516792	0.206918	0.463601	0.478345	0.196555	0.223781	0.180839	0.232336	0.513558	0.337246	0.480329	0.600181	0.512594	0.468	0.322334	0.396925	0.341367	0.472651	0.57371	0.393406	0.373336	0.311078	0.31538	0.468284	0.466331	0.503383	0.638746	0.593434	0.473242	0.682882	0.547146	0.467741	0.527388	0.554446	43	0.393206	0.0245183
20	0.169648	0.090998	0.136055	0.154988	0.0901525	0.405061	0.336965	0.52618	0.401352	0.505868	0.190348	0.448357	0.444491	0.190278	0.235986	0.17665	0.254811	0.495471	0.342512	0.460374	0.641081	0.457956	0.545465	0.332364	0.374582	0.341586	0.48243	0.586721	0.398189	0.350818	0.313068	0.354695	0.462335	0.485155	0.525999	0.596159	0.602524	0.443632	0.713938	0.548164	0.494978	0.508686	0.571314	43	0.39973	0.0239465
30	0.17791	0.104459	0.132701	0.162843	0.107469	0.428276	0.313399	0.50825	0.407769	0.51141	0.21248	0.482918	0.412297	0.189109	0.278456	0.23294	0.232954	0.46231	0.365577	0.469671	0.642865	0.397285	0.527195	0.324135	0.36353	0.346585	0.45245	0.561244	0.405106	0.39853	0.310515	0.337889	0.428484	0.400873	0.434677	0.607298	0.610778	0.429067	0.632977	0.521073	0.522769	0.515403	0.557634	43	0.393525	0.022149
40	0.2184	0.0875797	0.140761	0.187265	0.0983338	0.433241	0.353625	0.517871	0.405881	0.530615	0.204043	0.492088	0.318374	0.268638	0.260034	0.176517	0.239978	0.423527	0.243791	0.443403	0.631575	0.386154	0.463394	0.326299	0.369998	0.363482	0.444832	0.542208	0.388407	0.382923	0.263457	0.222871	0.410713	0.393458	0.476271	0.578879	0.591222	0.456244	0.595557	0.490286	0.46334	0.458299	0.558143	43	0.379116	0.0215282
50	0.236655	0.093587	0.146643	0.26431	0.087396	0.414788	0.349373	0.521819	0.382516	0.543094	0.191237	0.448768	0.3838	0.197725	0.284605	0.248367	0.344543	0.461496	0.223164	0.481342	0.646571	0.393581	0.448626	0.346898	0.398983	0.333653	0.362385	0.551412	0.39104	0.383945	0.229384	0.166212	0.260277	0.466509	0.430687	0.607598	0.587311	0.387171	0.505424	0.532771	0.731755	0.46811	0.536487	43	0.38307	0.0228062

## Sheet: Trained
Potential	P2227-302	P2227-402	P2227-502	P2227-602	P2227-802	P2303-402	P2303-506	P2303-602	P2304-102	P2304-202	P2304-302	P2311-204	P2311-305	P2311-402	P2312-102	P2312-202	P2313-106	P2313-202	P2313-302	P2313-310	P2313-406	P2314-106	P2316-203	P2316-303	P2316-505	P2316-602	P2317-207	P2317-209	P2317-215	P2317-223	L0312-003	L0312-104	L0312-203	L0312-305	P2701-102	P2701-204	P2723-102	P2723-202	P2723-302	P2723-402	P2724-202	P2729-102	P2729-202	P2729-302	P2729-402	P2729-502	P2731-102	P2731-202	P2731-302
mV	pA/pF	pA/pF	pA/pF	pA/pF	pA/pF	pA/pF	pA/pF	pA/pF	pA/pF	pA/pF	pA/pF	pA/pF	pA/pF	pA/pF	pA/pF	pA/pF	pA/pF	pA/pF	pA/pF	pA/pF	pA/pF	pA/pF	pA/pF	pA/pF	pA/pF	pA/pF	pA/pF	pA/pF	pA/pF	pA/pF	pA/pF	pA/pF	pA/pF	pA/pF	pA/pF	pA/pF	pA/pF	pA/pF	pA/pF	pA/pF	pA/pF	pA/pF	pA/pF	pA/pF	pA/pF	pA/pF	pA/pF	pA/pF	pA/pF
-30	0.0381743	0.00689753	0.0649718	0.0596298	0.0795202	0.0451803	0.02841	0.0155122	0.0435046	0.0552925	0.0323211	0.0235063	0.0485986	0.0525945	0.0452771	0.038792	0.0478581	0.13001	0.0568724	0.0654262	0.0610122	0.0440441	0.0435884	0.0418315	0.0590973	0.0455034	0.0721277	0.0473484	0.0423651	0.0462854	0.0788551	0.0523157	0.034532	0.0700914	0.0370241	0.0476285	0.032457	0.193339	0.0582037	0.067484	0.081567	0.0526665	0.0571718	0.0671116	0.0560899	0.129661	0.0244415	0.0873366	0.043611
-20	0.0344143	0.0316074	0.0630736	0.0966094	0.0765501	0.0219977	0.0389689	0.0390421	0.0335561	0.000605523	0.0222642	0.052181	0.0701764	0.0717401	0.0572765	0.0662272	0.0757465	0.160714	0.0601055	0.0942035	0.0944215	0.0334346	0.0551445	0.0647082	0.103219	0.0672829	0.0812999	0.0366701	0.0840282	0.0588496	0.0938152	0.0701663	0.032053	0.0591991	0.0690593	0.0675238	0.0785523	0.0689035	0.069064	0	0.111582	0.0559286	0.068776	0.101053	0.0524729	0.186262	0.0475022	0.0895294	0
-10	0.0578319	0.0871666	0.10766	0.140429	0.0446818	0.039474	0.0747701	0.0577677	0.0449133	0.0378392	0.0401482	0.161988	0.22691	0.241208	0.111258	0.114878	0.185934	0.200412	0.0590503	0.169259	0.171099	0.0767144	0.116624	0.166577	0.244067	0.211024	0.15828	0.114302	0.140641	0.117068	0.10573	0.0984025	0.0494838	0.122064	0.175491	0.195692	0.185899	0.156296	0.19386	0.13094	0.218528	0.121433	0.112123	0.0845782	0.109228	0.273079	0.0864724	0.158162	0.122173
0	0.136087	0.100793	0.190376	0.334683	0.111178	0.0935144	0.136955	0.155321	0.059197	0.0828497	0.0936285	0.344771	0.46773	0.42179	0.306227	0.189404	0.404234	0.807718	0.392325	0.321778	0.232524	0.19964	0.282466	0.464237	0.524883	0.484146	0.320237	0.209686	0.2134	0.149318	0.109352	0.102608	0.118846	0.096719	0.364363	0.369264	0.525649	0.394612	0.471677	0.5182	0.46378	0.302179	0.264588	0.264507	0.33747	0.396854	0.190217	0.419347	0.319104
10	0.272167	0.202816	0.27206	0.520195	0.207164	0.194207	0.285651	0.247975	0.0900807	0.157151	0.175698	0.43918	0.537018	0.404833	0.419501	0.193787	0.460093	0.469745	0.431067	0.407698	0.262175	0.188932	0.341794	0.720805	0.564768	0.520857	0.368524	0.236021	0.266579	0.167948	0.134312	0.125681	0.15479	0.168763	0.475938	0.383933	0.617382	0.591726	0.594371	0.882726	0.55827	0.496605	0.346863	0.584306	0.508878	0.438261	0.318119	0.626818	0.412974
20	0.339403	0.22505	0.334598	0.557343	0.253843	0.276797	0.364769	0.28415	0.22201	0.127457	0.249729	0.422276	0.541553	0.398112	0.428448	0.215721	0.482565	0.522942	0.450949	0.397039	0.247011	0.283885	0.401539	0.70873	0.591755	0.536553	0.375638	0.229926	0.24571	0.177258	0.111091	0.106316	0.178841	0.137627	0.480411	0.380459	0.571479	0.606099	0.573106	0.928631	0.546209	0.429189	0.305061	0.573754	0.559223	0.61364	0.337585	0.658192	0.397153
30	0.349488	0.251217	0.369673	0.60227	0.269265	0.279376	0.360044	0.309396	0.205091	0.205189	0.314411	0.434892	0.50445	0.398319	0.491149	0.225978	0.463303	0.528691	0.417753	0.407001	0.248396	0.241208	0.36858	0.714365	0.588002	0.504489	0.411738	0.245051	0.275819	0.17648	0.12517	0.11944	0.161426	0.101342	0.452901	0.361326	0.657068	0.581148	0.582145	0.881102	0.554203	0.491203	0.31438	0.562404	0.548266	0.705146	0.335126	0.660984	0.295446
40	0.364873	0.286479	0.348071	0.551804	0.287497	0.313553	0.374866	0.270668	0.292732	0.18694	0.32333	0.389732	0.499747	0.411554	0.453378	0.239466	0.439712	0.499789	0.420413	0.384258	0.223755	0.266067	0.3642	0.711117	0.587175	0.526245	0.36744	0.24136	0.215696	0.182433	0.133904	0.0790734	0.183344	0.0657077	0.526176	0.353075	0.605816	0.580999	0.557996	0.873607	0.548707	0.476121	0.29472	0.567693	0.602202	0.817936	0.322602	0.688835	0.249455
50	0.357582	0.247402	0.362472	0.567266	0.221653	0.309876	0.401864	0.237257	0.267134	0.582679	0.313246	0.424356	0.511509	0.378553	0.514258	0.194783	0.477659	0.465559	0.343053	0.377828	0.239996	0.197704	0.262381	0.712296	0.631595	0.551507	0.455963	0.2336	0.258212	0.211464	0.0925011	0.115599	0.109887	0.0532266	0.521316	0.362384	0.595503	0.599467	0.553097	0.852528	0.479098	0.517089	0.292151	0.603481	0.548745	0.935552	0.331569	0.722813	0.242042
[truncated: 14 more columns]
