# Supplementary material for: Cardiac electrophysiological remodeling associated with enhanced arrhythmia susceptibility in a canine model of elite exercise
Source: eLife journal article supplement (doi:10.7554/elife.80710), 2023-02-23
Supplement: fig5-data7 [file Figure5G-IKsIV.xls]

## Sheet: Sheet1
	Sedentary	SEMsed	Trained	SEMtr
mV	pA/pF	pA/pF	pA/pF	pA/pF
	n=33		n=36
-20	0.07	0.01	0.08	0.01
-10	0.15	0.02	0.18	0.02
0	0.24	0.03	0.27	0.03
10	0.31	0.03	0.35	0.04
20	0.37	0.04	0.4	0.04
30	0.41	0.04	0.43	0.04
40	0.45	0.05	0.47	0.05
50	0.5	0.05	0.51	0.05

## Sheet: Sedentary
Potential	P2226502	P2305102	P2305202	P2306102	P2306302	P2309104	P2309202	P2309304	P2309404	P2309502	P2318102	P2318202	P2318304	P2318402	P2318502	P2320402	P2320405	P2320413	L0319501	L0319512	L0319521	L0319533	P2629-302	P2629-402	P2629-405	P2716-102	P2716-202	P2717-102	P2721-304	P2721-602	P2727-304	P2727-402	P2728-302	N total	Mean	SE of mean
mV	pA/pF	pA/pF	pA/pF	pA/pF	pA/pF	pA/pF	pA/pF	pA/pF	pA/pF	pA/pF	pA/pF	pA/pF	pA/pF	pA/pF	pA/pF	pA/pF	pA/pF	pA/pF	pA/pF	pA/pF	pA/pF	pA/pF	pA/pF	pA/pF	pA/pF	pA/pF	pA/pF	pA/pF	pA/pF	pA/pF	pA/pF	pA/pF	pA/pF		pA/pF	pA/pF
																																		Statistics On Rows of B"P2226502":C41"P2728-302"	Statistics On Rows of B"P2226502":C41"P2728-302"	Statistics On Rows of B"P2226502":C41"P2728-302"
-20	0.0486987	0.0291346	0.0376089	0.0173413	0.0260191	0.0201789	0.00931855	0.0799767	0.0210166	0.0222244	0.0687383	0.0997026	0.117669	0.0306781	0.204847	0.0425406	0.00420292	0.052983	0.0426735	0.0645754	0.00941073	0.170243	0.167015	0.0882349	0.120685	0.0909454	0.117681	0.0858965	0.0478339	0.071488	0.241098	0.0808774	0.0390328	33	0.0718354	0.0100939
-10	0.0933842	0.0836432	0.0396583	0.0448547	0.048688	0.0384748	0.0181565	0.158201	0.100973	0.085084	0.154728	0.200108	0.365837	0.137344	0.352809	0.070997	0.0768408	0.216082	0.0921207	0.0589702	0.0563757	0.352951	0.382304	0.179047	0.296094	0.216163	0.172078	0.108357	0.158647	0.0802068	0.401549	0.142243	0.0641275	33	0.152942	0.0195521
0	0.126976	0.141429	0.0587495	0.0611371	0.0624155	0.190817	0.0268548	0.315804	0.193595	0.191221	0.327092	0.240285	0.551427	0.308271	0.490582	0.17337	0.131397	0.355635	0.189542	0.11632	0.161431	0.445897	0.533677	0.258979	0.425306	0.389198	0.321209	0.123857	0.0652898	0.197536	0.402831	0.219587	0.0814306	33	0.238762	0.0256114
10	0.184556	0.15017	0.113605	0.0860242	0.0819913	0.306972	0.0759162	0.608618	0.253849	0.295186	0.481087	0.180491	0.673188	0.429711	0.544739	0.165233	0.185711	0.414304	0.259992	0.189308	0.201841	0.55312	0.632741	0.361784	0.421039	0.453855	0.460211	0.133049	0.180257	0.165737	0.519986	0.266998	0.154292	33	0.308653	0.0309785
20	0.2309	0.189382	0.121542	0.10453	0.133743	0.427767	0.121401	0.869794	0.356111	0.423915	0.637451	0.26648	0.786656	0.446049	0.56953	0.197954	0.231909	0.490467	0.378205	0.281852	0.250154	0.561716	0.661012	0.319452	0.559818	0.583169	0.616483	0.111961	0.259951	0.177214	0.464204	0.307745	0.131994	33	0.371834	0.0363618
30	0.28436	0.186469	0.155052	0.0902396	0.130997	0.504536	0.149043	1.05184	0.433799	0.492464	0.74904	0.361624	0.824434	0.507757	0.641857	0.13918	0.255027	0.50091	0.457961	0.296234	0.313807	0.53885	0.544506	0.359378	0.722421	0.674167	0.742489	0.162652	0.311534	0.130607	0.506597	0.362838	0.0798902	33	0.414017	0.0421241
40	0.304865	0.263557	0.181182	0.18874	0.192705	0.584293	0.174824	1.17642	0.452336	0.585155	0.919894	0.336439	0.912265	0.534004	0.60076	0.222902	0.26696	0.449707	0.531251	0.337041	0.350421	0.568476	0.673207	0.364508	0.557968	0.793161	0.84534	0.15295	0.361343	0.140872	0.263377	0.422285	0.201475	33	0.451839	0.0450124
50	0.306315	0.355093	0.24429	0.321028	0.270038	0.606625	0.218104	1.2769	0.488562	0.60903	0.9839	0.266149	0.876345	0.466825	0.624458	0.185775	0.261033	0.450577	0.666673	0.396985	0.305058	0.574046	0.729441	0.333893	0.692991	0.982461	1.00309	0.216321	0.152049	0.215643	0.35325	0.570112	0.33305	33	0.495034	0.0490606

## Sheet: Trained
Potential	P2227102/104	P2303104	P2303204	P2304502	P2311502	P2311602	P2311804	P2311907	P2313503	P2313604	P2313702	P2313804	P2313904	P2316802	P2316805	P2316809	P2316812	P2317105	P2317108	P2317110	P2701-303	P2701-402	P2701-409	P2723-502	P2723-602	P2723-702	P2729-602	P2729-607	P2729-702	M0731-302	M0731-502	M0803-202	M0803-302	M0803-602	M0803-702	M0805-202	N total	Mean	SE of mean
mV	pA/pF	pA/pF	pA/pF	pA/pF	pA/pF	pA/pF	pA/pF	pA/pF	pA/pF	pA/pF	pA/pF	pA/pF	pA/pF	pA/pF	pA/pF	pA/pF	pA/pF	pA/pF	pA/pF	pA/pF	pA/pF	pA/pF	pA/pF	pA/pF	pA/pF	pA/pF	pA/pF	pA/pF	pA/pF	pA/pF	pA/pF	pA/pF	pA/pF	pA/pF	pA/pF	pA/pF		pA/pF	pA/pF
																																					Statistics On Rows of B"P2227102/104":C47"M0805-202"	Statistics On Rows of B"P2227102/104":C47"M0805-202"	Statistics On Rows of B"P2227102/104":C47"M0805-202"
-20	0.0152821	0.0193602	0.0272326	0.0263926	0.0270049	0.0487894	0.120399	0.10604	0.0611763	0.0703142	0.250933	0.138507	0.137367	0.00265817	0.0102067	0.0155571	0.0899391	0.0296183	0.0478881	0.0765557	0.127203	0.161722	0.0301344	0.0367412	0.151587	0.197299	0.0858295	0.0409192	0.0951524	0.000778733	0.0432059	0.0479736	0.0136697	0.113896	0.0882297	0.25913	36	0.0781859	0.0110863
-10	0.0244657	0.0262912	0.0255164	0.0401901	0.0962697	0.142414	0.252409	0.357916	0.183721	0.136491	0.459333	0.342301	0.416261	0.0290576	0.0112091	0.146818	0.165607	0.107745	0.182194	0.233348	0.247752	0.452359	0.132267	0.0556392	0.24897	0.398924	0.145176	0.0668948	0.197129	0.0818984	0.0630036	0.0672794	0.0360069	0.236953	0.203675	0.507138	36	0.181128	0.0234068
0	0.0486029	0.0743229	0.0627887	0.0657404	0.144801	0.164113	0.394268	0.641237	0.257416	0.245117	0.64772	0.52782	0.721869	0.0696288	0.161386	0.345503	0.248567	0.151562	0.2692	0.345377	0.381941	0.38991	0.280109	0.134395	0.282599	0.560048	0.216664	0.122159	0.282672	0.0633393	0.0441682	0.145918	0.0444751	0.340372	0.30396	0.678144	36	0.273831	0.032498
10	0.0941588	0.090736	0.0857255	0.0896588	0.216576	0.164192	0.460517	0.8514	0.332641	0.368979	0.78463	0.597504	0.963445	0.0962679	0.28766	0.46387	0.298142	0.206134	0.324849	0.379642	0.463845	0.60238	0.392055	0.187071	0.274069	0.671831	0.188246	0.143982	0.382687	0.130338	0.0583115	0.253475	0.0518692	0.442847	0.353949	0.785389	36	0.348308	0.0401695
20	0.119365	0.111496	0.0985455	0.0723306	0.304036	0.221981	0.515341	0.941342	0.314616	0.488302	0.846576	0.696619	1.02299	0.163405	0.356775	0.464116	0.342979	0.274016	0.374275	0.430008	0.616184	0.887893	0.452826	0.180127	0.256042	0.71495	0.246663	0.17135	0.378187	0.17483	0.109962	0.301513	0.156112	0.467243	0.377254	0.814763	36	0.401806	0.0435872
30	0.163966	0.132013	0.100729	0.0800052	0.347462	0.25195	0.516099	0.971318	0.377615	0.496949	0.75422	0.754152	1.05547	0.172501	0.435691	0.549782	0.344809	0.300072	0.373644	0.406309	0.637142	0.966	0.585775	0.224503	0.230848	0.777685	0.224671	0.1943	0.475433	0.214943	0.138838	0.339163	0.231193	0.431914	0.405145	0.855245	36	0.431043	0.0442205
40	0.242705	0.159998	0.106906	0.12248	0.361	0.247909	0.562466	1.08122	0.337664	0.514599	0.847895	0.794936	1.14037	0.212379	0.41553	0.611818	0.329576	0.257589	0.379454	0.418384	0.704491	1.04485	0.710068	0.240764	0.252669	0.835257	0.327366	0.316183	0.395922	0.379056	0.214053	0.37722	0.31063	0.45112	0.39301	0.901637	36	0.472199	0.0467357
50	0.337511	0.16877	0.158991	0.183037	0.37622	0.338497	0.514363	1.07231	0.346405	0.495209	0.792872	0.806373	1.18714	0.237017	0.555639	0.638041	0.322027	0.327239	0.376908	0.429876	0.729702	1.17155	0.693412	0.239508	0.187872	0.819245	0.42766	0.367685	0.529808	0.472162	0.287313	0.420374	0.369241	0.37117	0.464292	1.05172	36	0.507421	0.0470735
