# Supplementary material for: Cardiac electrophysiological remodeling associated with enhanced arrhythmia susceptibility in a canine model of elite exercise
Source: eLife journal article supplement (doi:10.7554/elife.80710), 2023-02-23
Supplement: fig6-data1 [file Figure6A-Kv43WesternB.xls]

## Sheet: Figure
	Sedentary	Sedentary	Trained	Trained
	a.u.	a.u.	a.u.	a.u.
	n=12 dogs	SEM	n=12 dogs	SEM
Sedentary	1.69725	0.189559
Trained			1.52653	0.126445

## Sheet: Dogs
Sedentary	Sedentary	Trained	Trained
	a.u.		a.u.
Dogs	Averages	Dogs	Averages
K6	0.968058	F10	0.946511
K11	1.53571	F7	0.988223
K2	0.708641	F4	0.96122
K5	1.56383	F8	2.04241
K12	1	F9	1.24765
K3	1.6542	F1	1.85868
K15	1.91029	F19	1.26613
K16	2.00044	F18	1.85373
K17	1.28581	F24	1.41763
K20	2.62593	F14	1.92187
K22	2.39198	F13	2.10423
K21	2.72216	F23	1.71013

## Sheet: DescStatsQuantities1
Data	N total	Mean	SE of mean	Minimum	Median	Maximum
		a.u.	a.u.	a.u.	a.u.	a.u.
Descriptive Statistics	Descriptive Statistics	Descriptive Statistics	Descriptive Statistics	Descriptive Statistics	Descriptive Statistics	Descriptive Statistics
[Kv43WesternB]Dogs
Sedentary	12	1.69725	0.189559	0.708641	1.60901	2.72216
Trained	12	1.52653	0.126445	0.946511	1.56388	2.10423
