# Supplementary material for: Cardiac electrophysiological remodeling associated with enhanced arrhythmia susceptibility in a canine model of elite exercise
Source: eLife journal article supplement (doi:10.7554/elife.80710), 2023-02-23
Supplement: fig6-data2 [file Figure6B-KChIP2WestB.xls]

## Sheet: Figure
	Sedentary	Sedentary	Trained	Trained
	a.u.	a.u.	a.u.	a.u.
	n=12 dogs	SEM	n=12 dogs	SEM
Sedentary	0.862613	0.0820545
Trained			0.903752	0.0894454

## Sheet: Dogs
Sedentary	Sedentary	Trained	Trained
	a.u.		a.u.
Dogs	Averages	Dogs	Averages
K6	0.817664	F10	0.605005
K11	1	F7	0.970592
K2	1.03663	F4	0.55757
K5	0.603848	F8	1.08635
K12	1.56116	F9	1.23345
K3	0.699932	F1	0.742161
K15	0.81399	F19	0.857871
K16	0.898459	F18	0.694283
K17	0.493356	F24	0.716423
K20	0.973142	F14	1.66769
K22	0.543622	F13	0.908173
K21	0.909552	F23	0.805466

## Sheet: DescStatsQuantities1
Data	N total	Mean	SE of mean	Minimum	Median	Maximum
		a.u.	a.u.	a.u.	a.u.	a.u.
Descriptive Statistics	Descriptive Statistics	Descriptive Statistics	Descriptive Statistics	Descriptive Statistics	Descriptive Statistics	Descriptive Statistics
[KChIP2WestB]Dogs
Sedentary	12	0.862613	0.0820545	0.493356	0.858062	1.56116
Trained	12	0.903752	0.0894454	0.55757	0.831669	1.66769
