# Supplementary material for: Cardiac electrophysiological remodeling associated with enhanced arrhythmia susceptibility in a canine model of elite exercise
Source: eLife journal article supplement (doi:10.7554/elife.80710), 2023-02-23
Supplement: fig6-data3 [file Figure6E-KChIP2ImmunCh.xls]

## Sheet: Figure
	Sedentary	Sedentary	Trained	Trained
	a.u.	a.u.	a.u.	a.u.
	n=6 dogs	SEM	n=6 dogs	SEM
Sedentary	16177.6	2298.26
Trained			12773.3	1978.65

## Sheet: Dogs
Sedentary	Sedentary	Trained	Trained
	a.u.		a.u.
Dogs	Averages	Dogs	Averages
K15	11320.2	F13	19733.7
K16	13293.5	F14	12418.2
K17	11243.8	F18	6660.46
K20	20926.2	F19	17094.4
K21	15229.6	F23	11159.1
K22	25052.2	F24	9574.23

## Sheet: DescStatsQuantities1
Data	N total	Mean	SE of mean	Minimum	Median	Maximum
		a.u.	a.u.	a.u.	a.u.	a.u.
Descriptive Statistics	Descriptive Statistics	Descriptive Statistics	Descriptive Statistics	Descriptive Statistics	Descriptive Statistics	Descriptive Statistics
[KChIP2ImmunCh]Dogs
Sedentary	6	16177.6	2298.26	11243.8	14261.6	25052.2
Trained	6	12773.3	1978.65	6660.46	11788.7	19733.7
