# Supplementary material for: Cardiac electrophysiological remodeling associated with enhanced arrhythmia susceptibility in a canine model of elite exercise
Source: eLife journal article supplement (doi:10.7554/elife.80710), 2023-02-23
Supplement: fig7-data1 [file Figure7A-HCN4ImmunoCh.xls]

## Sheet: Figure
	Sedentary	Sedentary	Trained	Trained
	a.u.	a.u.	a.u.	a.u.
	n=6 dogs	SEM	n=6 dogs	SEM
Sedentary	6453.03	1148.92
Trained			10391.2	615.844

## Sheet: Dogs
Sedentary	Sedentary	Trained	Trained
	a.u.		a.u.
Dogs	Averages	Dogs	Averages
K15	5508.82	F13	11922.4
K16	7406.29	F14	11507
K17	3873.04	F18	7967.77
K20	3368.33	F19	11209.2
K21	7602.28	F23	10463.4
K22	10959.4	F24	9277.2

## Sheet: DescStatsQuantities1
Data	N total	Mean	SE of mean	Minimum	Median	Maximum
		a.u.	a.u.	a.u.	a.u.	a.u.
Descriptive Statistics	Descriptive Statistics	Descriptive Statistics	Descriptive Statistics	Descriptive Statistics	Descriptive Statistics	Descriptive Statistics
[HCN4ImmunoCh]Dogs
Sedentary	6	6453.03	1148.92	3368.33	6457.55	10959.4
Trained	6	10391.2	615.844	7967.77	10836.3	11922.4
