# Supplementary material for: Cardiac electrophysiological remodeling associated with enhanced arrhythmia susceptibility in a canine model of elite exercise
Source: eLife journal article supplement (doi:10.7554/elife.80710), 2023-02-23
Supplement: fig7-data2 [file Figure7B-HCN1ImmunoCh.xls]

## Sheet: Figure
	Sedentary	Sedentary	Trained	Trained
	a.u.	a.u.	a.u.	a.u.
	n=6 dogs	SEM	n=6 dogs	SEM
Sedentary	7237.81	1050.32
Trained			7518.32	1066.64

## Sheet: Dogs
Sedentary	Sedentary	Trained	Trained
	a.u.		a.u.
Dogs	Averages	Dogs	Averages
K15	7350.21	F13	7664.64
K16	7471.5	F14	11395.3
K17	4881.28	F18	5947.3
K20	5329.89	F19	7628
K21	6354.65	F23	8817.76
K22	12039.4	F24	3656.91

## Sheet: DescStatsQuantities1
Data	N total	Mean	SE of mean	Minimum	Median	Maximum
		a.u.	a.u.	a.u.	a.u.	a.u.
Descriptive Statistics	Descriptive Statistics	Descriptive Statistics	Descriptive Statistics	Descriptive Statistics	Descriptive Statistics	Descriptive Statistics
[HCN1ImmunoCh]Dogs
Sedentary	6	7237.81	1050.32	4881.28	6852.43	12039.4
Trained	6	7518.32	1066.64	3656.91	7646.32	11395.3
