# Supplementary material for: Cardiac electrophysiological remodeling associated with enhanced arrhythmia susceptibility in a canine model of elite exercise
Source: eLife journal article supplement (doi:10.7554/elife.80710), 2023-02-23
Supplement: fig7-data3 [file Figure7C-HCN2ImmunoCh.xls]

## Sheet: Figure
	Sedentary	Sedentary	Trained	Trained
	a.u.	a.u.	a.u.	a.u.
	n=6 dogs	SEM	n=6 dogs	SEM
Sedentary	12269.6	2469.07
Trained			11545.2	1827.05

## Sheet: Dogs
Sedentary	Sedentary	Trained	Trained
	a.u.		a.u.
Dogs	Averages	Dogs	Averages
K15	12267.3	F13	9926.26
K16	5146.62	F14	17784.8
K17	14264.2	F18	7536.25
K20	5143.78	F19	6394.92
K21	19467.4	F23	12127.4
K22	17328.1	F24	15501.7

## Sheet: DescStatsQuantities1
Data	N total	Mean	SE of mean	Minimum	Median	Maximum
		a.u.	a.u.	a.u.	a.u.	a.u.
Descriptive Statistics	Descriptive Statistics	Descriptive Statistics	Descriptive Statistics	Descriptive Statistics	Descriptive Statistics	Descriptive Statistics
[HCN2ImmunoCh]Dogs
Sedentary	6	12269.6	2469.07	5143.78	13265.7	19467.4
Trained	6	11545.2	1827.05	6394.92	11026.8	17784.8
