# Supplementary material for: Cardiac electrophysiological remodeling associated with enhanced arrhythmia susceptibility in a canine model of elite exercise
Source: eLife journal article supplement (doi:10.7554/elife.80710), 2023-02-23
Supplement: table1-data1 [file Table1-Echo-Autopsy data.xlsx]

## Sheet: Echo data
Echo data
Trained 0th week	Date	EDD	ESD	IVS	PW	EDV	ESV	EF	LA (ml)	LAVI (ml/m2)	EDD/BSA	ESD/BSA	IVS/BW	PW/BW	LVM (g)	LVMI	EDV/BSA	ESV/BSA
1	27.09.2019	34	20.7	6	6	45.7	13.93	69.57	14	22.3937	54.3847	33.1107	0.38961	0.38961	48.2831	77.2313	73.0995	22.2817
4	27.09.2019	26	19.1	6.6	6.9	24.5	11.26	60	8.56	16.4448	49.9491	36.6934	0.564103	0.589744	36.6533	70.4155	47.0675	21.6318
7	27.09.2019	31.9	22.1	7	7	40.7	16.48	59.54	8.82	14.2943	51.6993	35.8168	0.463576	0.463576	53.4489	86.6228	65.9612	26.7086
8	27.09.2019	29.6	15.5	7.5	6.9	33.74	6.59	80.46	8.56	15.7354	54.4123	28.4929	0.6	0.552	49.2962	90.6189	62.0227	12.1141
9	27.09.2019	28.5	18.7	6.1	6.6	30.95	10.77	65.21	8.45	15.6166	52.6715	34.5599	0.491935	0.532258	38.926	71.9399	57.1994	19.9043
10	27.09.2019	35	20	7	7	48	13	73	11.2	16.2661	50.8315	29.0466	0.393258	0.393258	62.2125	90.353	69.7118	18.8803
13	30.03.2020	25	16	5.8	6.6	23.1	7.33	68.3	8.1	17.7548	54.7988	35.0712	0.604167	0.6875	30.5254	66.9103	50.6341	16.067
14	30.03.2020	24.4	15.3	6	7.8	20.9	6.3	69.5	6.72	13.8757	50.382	31.592	0.571429	0.742857	34.2924	70.8081	43.1551	13.0085
18	30.03.2020	28.2	14.1	7.5	6.9	30.18	5.17	82.8	9.66	18.0475	52.6851	26.3426	0.614754	0.565574	45.6632	85.3109	56.3843	9.65894
19	30.03.2020	30.3	15	7.3	6.5	35.9	6.1	83	7.46	14.9333	60.654	30.0267	0.663636	0.590909	48.2132	96.5124	71.864	12.2109
23	30.03.2020	27	17.4	7.3	7.3	26.9	8.8	67.06	7.95	15.9142	54.0481	34.831	0.663636	0.663636	43.521	87.1196	53.8479	17.6157
24	31.03.2020	28.5	17.1	7.3	7.9	30.95	8.54	72.4	6.86	11.0207	45.7856	27.4714	0.477124	0.51634	50.1737	80.6047	49.7216	13.7196
	mean	29.0333	17.5833	6.78333	6.95	32.6267	9.5225	70.9033	8.86167	16.0248	52.6919	31.9213	0.541436	0.557272	45.1007	81.204	58.3891	16.9835
	SD	3.34048	2.53407	0.64784	0.531721	8.65029	3.5731	7.92891	2.01878	2.73014	3.5739	3.55927	0.0961418	0.109165	8.87905	9.62316	10.0828	5.0831
	SE	0.964313	0.731523	0.187015	0.153495	2.49712	1.03146	2.28888	0.582771	0.788123	1.0317	1.02747	0.0277537	0.0315133	2.56316	2.77797	2.91065	1.46736
	n	12	12	12	12	12	12	12	12	12	12	12	12	12	12	12	12	12
Trained 16th week	Date	EDD	ESD	IVS	PW	EDV	ESV	EF	LA (ml)	LAVI (ml/m2)	EDD/BSA	ESD/BSA	IVS/BW	PW/BW	LVM (g)	LVMI	EDV/BSA	ESV/BSA
1	26.02.2020	33.9	20.4	8.6	7.6	44	15.3	65	25.8	43.9757	57.7821	34.7715	0.614286	0.542857	72.2125	123.085	74.9974	26.0786
4	26.02.2020	29.5	21	8.3	8.3	33.7	6.92	79.5	11.96	26.2158	64.6626	46.031	0.864583	0.864583	60.1539	131.855	73.8688	15.1683
7	26.02.2020	33.7	22	8	7.3	46	16	65	7.7	13.719	60.0428	39.1971	0.610687	0.557252	66.0415	117.665	81.9575	28.507
8	26.02.2020	32	16	9	9.6	40.9	7.67	81.2	11.2	22.5569	64.4482	32.2241	0.825688	0.880734	80.5266	162.181	82.3729	15.4474
9	26.02.2020	29.5	17.1	9	8.1	36.7	8.54	76.76	7.97	15.7637	58.3475	33.8217	0.803571	0.723214	62.8351	124.28	72.5882	16.8911
10	21.02.2020.	36.4	21.4	8	7.8	49.4	12.54	74.6	13.3	21.6506	59.2542	34.8363	0.533333	0.52	78.2152	127.324	80.4164	20.4134
13	20.07.2020	30.8	19	7.6	7	37.26	11.2	69.95	12	27.0604	69.4551	42.8457	0.826087	0.76087	53.5468	120.75	84.0226	25.2564
14	20.07.2020	27.9	12.4	7.3	7.9	29.28	3.64	87	8	17.9107	62.4637	27.7616	0.784946	0.849462	48.5438	108.682	65.5533	8.14938
18	20.07.2020	32	13	8.6	6.7	41	4.15	89	9.17	18.9346	66.0748	26.8429	0.819048	0.638095	60.7829	125.507	84.6583	8.56907
19	26.06.2020	33.3	22.1	7.9	7.5	45.2	16.4	63.7	10.7	22.9776	71.5099	47.4585	0.79798	0.757576	65.3751	140.389	97.0645	35.2181
23	20.07.2020	31.1	20.3	7.3	7.9	38.1	13.2	65.37	9.93	21.1817	66.3395	43.302	0.73	0.79	57.5521	122.765	81.2712	28.157
24	26.06.2020	33.6	15.9	7.9	6	46.1	6.99	84.3	9	16.4566	61.4381	29.0734	0.626984	0.47619	57.6072	105.336	84.2945	12.7813
	mean	31.975	18.3833	8.125	7.64167	40.6367	10.2125	75.115	11.3942	22.3669	63.4849	36.5138	0.736433	0.696736	63.6161	125.818	80.2555	20.0531
	SD	2.36763	3.42765	0.586399	0.892859	5.86338	4.50675	9.21564	4.88115	7.92619	4.38085	7.13966	0.110331	0.14429	9.55388	14.7645	7.88698	8.5926
	SE	0.683477	0.989477	0.169279	0.257746	1.69261	1.30099	2.66033	1.40907	2.28809	1.26464	2.06104	0.0318499	0.041653	2.75797	4.26214	2.27678	2.48047
	n	12	12	12	12	12	12	12	12	12	12	12	12	12	12	12	12	12
Sedentary 0th week	Date	EDD	ESD	IVS	PW	EDV	ESV	EF	LA (ml)	LAVI (ml/m2)	EDD/BSA	ESD/BSA	IVS/BW	PW/BW	LVM (g)	LVMI	EDV/BSA	ESV/BSA
2	14.01.2020	26.5	13.5	7	7	25.8	4.63	82.06	6.79	12.6167	49.2403	25.0847	0.569106	0.569106	39.7872	73.9296	47.9397	8.60312
3	14.01.2020	30.6	13.5	7.5	6.7	36.75	4.58	87.53	14.24	24.157	51.9104	22.9016	0.531915	0.475177	50.9711	86.4683	62.3433	7.76959
5	14.01.2020	33	15	9	8	44	6.6	84	6.6	10.9895	54.9474	24.9761	0.62069	0.551724	74.1009	123.383	73.2632	10.9895
6	14.01.2020	29	15	7	7.6	38	12	67	8	12.172	44.1236	22.8226	0.421687	0.457831	48.6666	74.0464	57.8172	18.2581
11	14.01.2020	27.5	15	6.8	7.3	28.25	6.1	78	7.38	12.4607	46.4322	25.3266	0.478873	0.514085	42.5943	71.918	47.6985	10.2995
12	14.01.2020	33	12.5	7.8	7	45	7	83	14.7	22.7328	51.0328	19.3306	0.481481	0.432099	60.9681	94.284	69.5902	10.8251
15	31.03.2020	28.3	15	5.7	6	30.26	6.1	79.8	10.2	19.9377	55.3174	29.3202	0.5	0.526316	34.3911	67.2235	59.1486	11.9235
16	31.03.2020	26.8	13.3	5.8	6.6	26.5	4.38	83.5	6.3	11.4591	48.7466	24.1914	0.456693	0.519685	34.1021	62.0283	48.2009	7.96679
17	30.03.2020	27.4	13.5	6.1	7.2	27.9	4.63	83.4	8.4	14.6691	47.8491	23.5753	0.451852	0.533333	38.9783	68.0684	48.7222	8.08544
20	31.03.2020	28.2	13.5	7.8	8.4	30.1	4.6	84.6	7.1	15.2469	60.5579	28.9905	0.787879	0.848485	54.1659	116.318	64.6381	9.87824
21	31.03.2020	25.9	15.8	7	7	24.4	6.9	71.5	7	15.3437	56.7716	34.6328	0.729167	0.729167	38.395	84.16	53.4836	15.1245
22	31.03.2020	28.2	14.7	7.5	6.3	30.1	5.7	81	11.2	21.2748	53.5669	27.9232	0.630252	0.529412	42.9835	81.6486	57.176	10.8273
	mean	28.7	14.1917	7.08333	7.09167	32.255	6.10167	80.4492	8.9925	16.0883	51.708	25.7563	0.554966	0.557202	46.6753	83.6231	57.5018	10.8792
	SD	2.35024	1.00132	0.937922	0.680185	6.99579	2.10001	5.83706	2.95043	4.69258	4.73423	3.96743	0.115828	0.117707	11.8686	19.2489	8.73398	3.10503
	SE	0.678456	0.289058	0.270755	0.196352	2.01951	0.606221	1.68501	0.851716	1.35463	1.36665	1.1453	0.0334367	0.0339792	3.42617	5.55667	2.52128	0.896346
	n	12	12	12	12	12	12	12	12	12	12	12	12	12	12	12	12	12
Sedentary 16th week	Date	EDD	ESD	IVS	PW	EDV	ESV	EF	LA (ml)	LAVI (ml/m2)	EDD/BSA	ESD/BSA	IVS/BW	PW/BW	LVM (g)	LVMI	EDV/BSA	ESV/BSA
2	21.02.2020	28	16.9	7.2	8.6	32	7.6	76.3	9.57	17.6865	51.7474	31.2333	0.580645	0.693548	51.6475	95.4508	59.1399	14.0457
3	21.02.2020	32.2	20.2	7.6	6.2	47.3	13.1	72.3	15.2	25.5445	54.1141	33.9474	0.531469	0.433566	53.2067	89.4172	79.4906	22.0154
5	21.02.2020	34.9	21.9	9.7	8	50.49	15.97	68.3	8	13.4445	58.6516	36.8043	0.678322	0.559441	85.7157	144.05	84.8516	26.8386
6	21.02.2020	31.1	16.3	7.6	7.6	40.3	12.27	69.63	9	13.531	46.7571	24.5062	0.449704	0.449704	57.5521	86.5264	60.5888	18.4473
11	21.02.2020	26.9	17.5	7.1	7.8	28.6	7.3	74.45	6.87	12.0568	47.2093	30.7124	0.529851	0.58209	44.5703	78.2206	50.1928	12.8115
12	21.02.2020	31.1	18.9	7.1	6.8	45	16	63.25	17.2	25.3615	45.8571	27.8681	0.408046	0.390805	50.7897	74.8897	66.3527	23.5921
15	26.06.2020	29.5	17.3	6.7	7.4	33.6	8.76	73.93	11	21.0128	56.3524	33.0474	0.567797	0.627119	47.5988	90.9257	64.1845	16.7338
16	26.06.2020	30.3	19.5	7.9	7.5	35.9	11.9	66.9	12	21.9422	55.404	35.656	0.626984	0.595238	56.2652	102.882	65.6436	21.7593
17	26.06.2020	31.8	18.7	8.2	9	40.4	10.7	73.4	10.8	20.2883	59.7377	35.1288	0.677686	0.743802	71.1295	133.62	75.8932	20.1004
20	26.06.2020	27.2	18.4	7	6.2	26.95	10.31	61.7	8	16.3122	55.4615	37.5181	0.654206	0.579439	38.1191	77.7258	54.9518	21.0224
21	26.06.2020	28.8	18.4	6.2	6	31.6	10.3	67.4	7	15.9007	65.4199	41.7961	0.681319	0.659341	37.4681	85.1097	71.7802	23.3967
22	26.06.2020	32.7	20.5	6.5	7.5	43.1	13.5	68.6	10.4	21.2059	66.6762	41.8	0.607477	0.700935	55.6461	113.464	87.882	27.5269
	mean	30.375	18.7083	7.4	7.38333	37.9367	11.4758	69.68	10.42	18.6906	55.2824	34.1682	0.582792	0.584586	54.1424	97.6902	68.4126	20.6908
	SD	2.39967	1.62338	0.923432	0.942755	7.62588	2.8824	4.5364	3.1701	4.5619	6.7792	5.15791	0.0901591	0.111798	13.4549	22.1885	11.7916	4.57814
	SE	0.692725	0.468631	0.266572	0.27215	2.2014	0.832077	1.30955	0.91513	1.31691	1.95699	1.48896	0.0260267	0.0322733	3.88411	6.40526	3.40394	1.3216
	n	12	12	12	12	12	12	12	12	12	12	12	12	12	12	12	12	12

## Sheet: Autopsy
Autopsy data
	#dog	IVS (mm)	LVPW (mm)	LVM (g)	LVMi (g/m2)	BW (kg)
Trained	1	4	4	108		13.7
	4	5.5	4	86		9.3
	10	4.5	4	112		15.3
	7	6	4	98		12.5
	8	5	4.5	86		10.1
	9	3	3	86		9.8
	13	3.5	2	68		8.7
	14	4.5	2	60		9.4
	18	5	3	72		10.4
	19	4	4	72		9.8
	23	3	2.5	64		9.3
	24	3	4	88		12.9
	mean	4.25	3.41667	83.3333		10.9333
	SD	1.0113	0.874729	16.7838		2.11631
	SE	0.291937	0.252513	4.84507		0.610927
	n	12	12	12		12
Sedentary	2	4	3	74		12.7
	3	4	2	86		13.7
	5	3	2	88		12.9
	6	9	3	112		16.8
	11	6.5	2.5	76		12
	12	3	3.5	94		17.8
	15	4	1	62		11.1
	16	1.41	5.5	78		11.3
	17	2	4	84		12.6
	20	1.5	1	60		10.6
	21	3	1.5	60		9.3
	22	2	1.5	78		11.6
	mean	3.6175	2.54167	79.3333		12.7
	SD	2.20438	1.33924	15.1197		2.4506
	SE	0.636351	0.386605	4.36469		0.707428
	n	12	12	12		12
