# Supplementary material for: Cardiac electrophysiological remodeling associated with enhanced arrhythmia susceptibility in a canine model of elite exercise
Source: eLife journal article supplement (doi:10.7554/elife.80710), 2023-02-23
Supplement: table2-data1 [file Table2-ECG parameters.xlsx]

## Sheet: EKG variab 12 kutya
10-es kutya 16. heti dofetilid adás előtti nyugalmi adatai 16.heti atropin adás előtti nyugalmi adatokra cserélve, magas frekvencia, nyugtalan állat miatt
0.hét			"-"10min					16.hét			"-"10min
			Mean	STV							Mean	STV
PQ	Futó	1	103.002	2.35113				PQ	Futó	1	109.952	3.28805
	Futó	4	81.1725	3.07768					Futó	4	84.5725	2.72943
	Futó	10	87.0325	2.58094					Futó	10	98.9881	3.09275
	Futó	7	97.14	3.35345					Futó	7	118.325	5.01869
	Futó	8	108.323	4.82247					Futó	8	110.943	6.07405
	Futó	9	99.595	3.44891					Futó	9	107.24	5.26441
	Futó	13	94.85	3.11657					Futó	13	99.65	3.97571
	Futó	14	93.8425	3.3729					Futó	14	109.863	5.11415
	Futó	18	88.795	2.70292					Futó	18	113.33	4.63332
	Futó	19	105.25	2.9999					Futó	19	122.32	5.4076
	Futó	23	104.743	4.4371					Futó	23	129.312	9.23172
	Futó	24	116.195	2.13723					Futó	24	123.7	2.82843
		mean	98.3283	3.2001						mean	110.683	4.72152
		SD	9.89968	0.787433						SD	12.3241	1.80915
		SE	2.85779	0.227312						SE	3.55765	0.522256
		n	12	12						n	12	12
	Páros t (n=6)		0.024021	0.0313599
	Páros t (n=12)		0.000253906	0.0016611
			Mean	STV							Mean	STV
PQ	Kontroll	2	114.82	1.4425				PQ	Kontroll	2	110.897	2.64811
	Kontroll	3	100.685	3.34285					Kontroll	3	72.225	2.56857
	Kontroll	5	97.5375	1.72534					Kontroll	5	98.8	2.26097
	Kontroll	6	104.263	2.56149					Kontroll	6	102.28	4.19668
	Kontroll	11	101.9	4.44063					Kontroll	11	102.097	4.7164
	Kontroll	12	104.982	5.27855					Kontroll	12	101.438	4.40174
	Kontroll	15	87.51	2.34229					Kontroll	15	97.8	2.39532
	Kontroll	16	105.683	7.67564					Kontroll	16	109.3	9.54594
	Kontroll	17	108.343	2.78954					Kontroll	17	111.03	4.13304
	Kontroll	20	109.29	2.63397					Kontroll	20	111.32	3.41002
	Kontroll	21	104.332	4.20375					Kontroll	21	104.468	5.46417
	Kontroll	22	99.03	2.71175					Kontroll	22	112.253	2.36174
		mean	103.198	3.42903						mean	102.826	4.00856
		SD	6.83543	1.74313						SD	10.9491	2.04804
		SE	1.97322	0.503198						SE	3.16074	0.591218
		n	12	12						n	12	12
	Páros t (n=6)		0.239701	0.459081					Kétmintás (n=6)		0.353555	0.302682
	Páros t (n=12)		0.901776	0.0531244					Kétmintás (n=8)		0.112926	0.375892
			Mean	STV							Mean	STV
QRS	Futó	1	50.84	1.36472				QRS	Futó	1	58.87	1.99581
	Futó	4	58.6125	2.23446					Futó	4	68.0325	2.01172
	Futó	10	57.7025	2.55796					Futó	10	65.7381	2.29978
	Futó	7	63.335	2.50846					Futó	7	65.3775	3.86611
	Futó	8	47.32	2.05768					Futó	8	73.23	4.09768
	Futó	9	57.8125	3.15723					Futó	9	68.9975	1.96576
	Futó	13	55.63	1.18617					Futó	13	75.675	2.67817
	Futó	14	65.925	2.62867					Futó	14	72.33	0.843225
	Futó	18	69.67	2.09657					Futó	18	73.41	2.61099
	Futó	19	61.995	2.31577					Futó	19	73.2875	2.58271
	Futó	23	57.7175	2.07182					Futó	23	75.215	3.29335
	Futó	24	78.87	1.58569					Futó	24	79.925	2.7312
		mean	60.4525	2.1471						mean	70.8407	2.58137
		SD	8.41168	0.56041						SD	5.68897	0.886062
		SE	2.42824	0.161776						SE	1.64226	0.255784
		n	12	12						n	12	12
	Páros t (n=6)		0.021818	0.453578
	Páros t (n=12)		0.000542297	0.212786
			Mean	STV							Mean	STV
QRS	Kontroll	2	53.1	0.989949				QRS	Kontroll	2	50.8625	1.78544
	Kontroll	3	58.095	2.17612					Kontroll	3	56.0775	1.92156
	Kontroll	5	51.6775	0.820244					Kontroll	5	41.51	1.00763																													24 kutya adatai
	Kontroll	6	57.87	3.16961					Kontroll	6	55.605	3.96157																															Baseline	DOF	QT%	Baseline	DOF	QTc%	Baseline
527.655	Kontroll	11	67.325	2.62337					Kontroll	11	55.8175	2.83373																															0th week	0th week	0th week	0th week	0th week	0th week	16th week
	Kontroll	12	55.1125	2.40063					Kontroll	12	48.07	4.12066																															Mean QT	Mean QT	QT%	Mean QTc	Mean QTc	QTc %	Mean QT
	Kontroll	15	55.4925	2.2433					Kontroll	15	53.6175	1.51321																													Futó	1	208.095	246.218	118.32	209.838	244.346	116.445	249.898
	Kontroll	16	59.9025	3.70524					Kontroll	16	74.035	3.13248																													Futó	4	219.822	253.369	115.261	225.068	255.412	113.482	255.695
	Kontroll	17	57.3175	1.9852					Kontroll	17	55.615	1.9852																													Futó	10	224.082	261.618	116.751	220.6	257.015	116.507	236.805
	Kontroll	20	69.7725	3.02642					Kontroll	20	55.4275	1.98697																													Futó	7	224.645	266.917	118.817	228.742	266.329	116.432	258.502
	Kontroll	21	62.4375	2.22915					Kontroll	21	56.8875	2.36881																													Futó	8	215.947	264.778	122.612	211.022	259.288	122.873	238.65
	Kontroll	22	67.445	1.06596					Kontroll	22	71.6975	1.8703																													Futó	9	214.5	248.092	115.661	212.922	250.97	117.87	252.667
		mean	59.629	2.20293						mean	56.2685	2.37396																													Futó	13	217.868	246.338	113.068	206.359	239.034	115.834	243.905
		SD	5.91858	0.895019						SD	5.80052	1.2554																													Futó	14	188.787	231.603	122.679	191.413	231.869	121.135	252.97
		SE	1.70855	0.25837						SE	1.67447	0.362404																													Futó	18	216.74	264.59	122.077	209.638	249.322	118.93	252.47
		n	12	12						n	12	12																													Futó	19	216.312	254.2	117.515	215.655	251.913	116.813	236.802
																																									Futó	23	227.555	249.662	109.715	219.075	246.089	112.331	270.395
	Páros t (n=6)		0.0205131	0.0965432					Kétmintás (n=6)		0.000522911	0.880431																													Futó	24	216.445	269.202	124.375	212.402	265.873	125.174	266.883
	Páros t (n=12)		0.150745	0.461091					Kétmintás (n=8)		9.26357e-05	0.587224																														mean	215.9	254.716	118.071	213.561	251.455	117.819	251.304
																																										SD	9.98938	11.0915	4.35752	9.66273	10.2658	3.70859	10.9612
																																										SE	2.88369	3.20185	1.25791	2.78939	2.96348	1.07058	3.16422
			Mean	STV	RRmean	QTc					Mean	STV	RRmean	QTc																												n	12	12	12	12	12	12	12
QT	Futó	1	208.095	2.23799	489.175	209.838		QT	Futó	1	249.898	2.6216	753.888	239.649
	Futó	4	219.822	3.00167	411.863	225.068			Futó	4	255.695	2.89737	556.212	254.401																												Páros T	2.67176e-06	0.000757952	0.0373624	1.2929e-05	0.0151	0.0459586
	Futó	10	224.082	2.32638	604.525	220.6			Futó	10	236.805	2.63145	412.8	242.008
	Futó	7	224.645	3.05293	437.212	228.742			Futó	7	258.502	6.53543	822.05	245.166																													Baseline	DOF	QT%	Baseline	DOF	QTc%	Baseline
	Futó	8	215.947	3.47543	636.388	211.022			Futó	8	238.65	2.58271	1123.75	211.647																													0th week	0th week	0th week	0th week	0th week	0th week	16th week
	Futó	9	214.5	2.7312	562.5	212.922			Futó	9	252.667	4.13481	847	238.201																													Mean QT	Mean QT	QT%	Mean QTc	Mean QTc	QTc %	Mean QT
	Futó	13	217.868	1.62281	781.712	206.359			Futó	13	243.905	3.3128	902.1	226.943																											Kontroll	2	224.66	240.527	107.063	221.588	241.403	108.942	221.348
	Futó	14	188.787	1.85262	469.688	191.413			Futó	14	252.97	2.37058	939.513	234.313																											Kontroll	3	236.752	264.288	111.63	226.356	257.52	113.768	239.758
	Futó	18	216.74	2.36174	684.438	209.638			Futó	18	252.47	3.24385	1099.1	226.584																											Kontroll	5	207.517	234.85	113.171	209.342	234.09	111.822	207.33
	Futó	19	216.312	3.44007	542.175	215.655			Futó	19	236.802	5.06112	654.875	231.039																											Kontroll	6	203.535	255.94	125.747	205.216	252.717	123.147	229.963
	Futó	23	227.555	2.15844	714.85	219.075			Futó	23	270.395	3.72645	1052.34	246.627																											Kontroll	11	215.115	238.195	110.729	215.413	239.441	111.155	217.34
	Futó	24	216.445	1.91096	616.913	212.402			Futó	24	266.883	3.66812	938.35	248.278																											Kontroll	12	249.592	289.625	116.039	248.735	289.468	116.376	225.237
		mean	215.9	2.51435	579.286	213.561				mean	251.304	3.56552	841.831	237.071																											Kontroll	15	182.422	226.928	124.397	185.209	233.153	125.886	216.405
		SD	9.98938	0.618921	115.101	9.66273				SD	10.9612	1.21314	217.678	11.7474																											Kontroll	16	208.57	260.215	124.761	206.003	255.812	124.179	214.39
		SE	2.88369	0.178667	33.2268	2.78939				SE	3.16422	0.350203	62.8381	3.39119																											Kontroll	17	242.82	287.275	118.308	232.773	263.373	113.146	284.755
		n	12	12	12	12				n	12	12	12	12																											Kontroll	20	237.317	261.905	110.361	226.006	257.178	113.792	211.545
																																									Kontroll	21	206.732	253.955	122.842	205.067	245.122	119.533	206.732
	Páros t (n=6)		0.000990374	0.275423	0.0637727	0.00595056																																			Kontroll	22	209.665	249.51	119.004	209.956	246.568	117.438	201.148
	Páros t (n=12)		2.67176e-06	0.0079869	0.000604831	1.2929e-05																																				mean	218.725	255.268	117.004	215.972	251.32	116.599	222.996
																																										SD	19.6689	19.3506	6.45189	16.3945	15.4414	5.51729	22.196
			Mean	STV	RRmean	QTc					Mean	STV	RRmean	QTc																												SE	5.67794	5.58604	1.8625	4.73267	4.45755	1.5927	6.40744
QT	Kontroll	2	224.66	2.57387	595.462	221.588		QT	Kontroll	2	221.348	1.4478	655.288	215.566																												n	12	12	12	12	12	12	12
	Kontroll	3	236.752	4.10652	757.163	226.356			Kontroll	3	239.758	2.8408	740.025	230.137
	Kontroll	5	207.517	3.3676	487.387	209.342			Kontroll	5	207.33	1.68999	433.25	211.607																												Kétmintás	0.661659	0.932436	0.639827	0.66505	0.980155	0.531421	0.000662873
	Kontroll	6	203.535	1.90212	490.55	205.216			Kontroll	6	229.963	4.1843	615.25	225.994																												Páros T	0.492724	0.358695	0.830453	0.701381	0.500369	0.928095
	Kontroll	11	215.115	3.22087	521.087	215.413			Kontroll	11	217.34	3.72115	551.875	216.243
	Kontroll	12	249.592	2.77539	546.587	248.735			Kontroll	12	225.237	2.95747	518.55	225.65
	Kontroll	15	182.422	1.40714	466.137	185.209			Kontroll	15	216.405	2.0842	619	212.267
	Kontroll	16	208.57	3.25976	584.325	206.003			Kontroll	16	214.39	2.17435	878.25	198.508
	Kontroll	17	242.82	2.786	749.438	232.773			Kontroll	17	284.755	2.12486	1159.1	256.151
	Kontroll	20	237.317	2.22739	777.35	226.006			Kontroll	20	211.545	2.84434	465.938	214.341
	Kontroll	21	206.732	1.92687	564.425	205.067			Kontroll	21	206.732	2.56503	508.637	207.594
	Kontroll	22	209.665	1.72534	521.237	209.956			Kontroll	22	201.148	2.31224	585.263	198.538
		mean	218.725	2.60657	588.429	215.972				mean	222.996	2.57888	644.202	217.716
		SD	19.6689	0.798409	111.304	16.3945				SD	22.196	0.793142	202.96	15.6303
		SE	5.67794	0.230481	32.1306	4.73267				SE	6.40744	0.22896	58.5895	4.51209
		n	12	12	12	12				n	12	12	12	12
	Páros t (n=6)		0.927436	0.773029	0.505769	0.968506			Kétmintás (n=6)		0.00149522	0.351658	0.160624	0.0231679
	Páros t (n=12)		0.492724	0.93462	0.313812	0.701381			Kétmintás (n=12)		0.000662873	0.0276727	0.0312893	0.00239876
			Mean	STV							Mean	STV
TpTe	Futó	1	19.8	2.96985				TpTe	Futó	1	33.03	3.48073
	Futó	4	27.005	2.93803					Futó	4	33.1825	2.24683
	Futó	10	16.84	3.19082					Futó	10	34.2952	2.9025
	Futó	7	34.7575	3.00874					Futó	7	43.5275	3.3676
	Futó	8	47.0825	3.64337					Futó	8	48.4675	3.59033
	Futó	9	23.02	1.4425					Futó	9	33.9225	1.10662
	Futó	13	23.495	1.46725					Futó	13	32.3125	2.24153
	Futó	14	23.045	1.80843					Futó	14	30.11	1.58038
	Futó	18	34.8175	1.72357					Futó	18	37.685	2.67286
	Futó	19	23.35	2.40416					Futó	19	28.5425	3.57973
	Futó	23	37.4475	1.44603					Futó	23	40.3375	3.56735
	Futó	24	24.6675	2.10541					Futó	24	42.07	3.44007
		mean	27.944	2.34568						mean	36.4569	2.81471
		SD	8.74202	0.781137						SD	5.99985	0.85353
		SE	2.5236	0.225495						SE	1.73201	0.246393
		n	12	12						n	12	12
	Páros t (n=6)		0.00827048	0.671766					Kétmintás (n=6)		7.91363e-12	0.967719
	Páros t (n=12)		0.000195535	0.07721					Kétmintás (n=12)		9.85593e-19	0.490555
TpTe	Kontroll	2	14.92	1.90919				TpTe	Kontroll	2	20.265	2.26981
	Kontroll	3	17.715	2.5721					Kontroll	3	22.8525	2.15668
	Kontroll	5	33.6225	3.55144					Kontroll	5	22.6375	1.59099
	Kontroll	6	43.1775	3.16784					Kontroll	6	44.4725	3.36936
	Kontroll	11	29.9025	2.83903					Kontroll	11	40.775	3.32694
	Kontroll	12	33	2.05061					Kontroll	12	35.66	2.95571
	Kontroll	15	21.3775	1.50967					Kontroll	15	26.1875	1.88267
	Kontroll	16	23.7425	1.29401					Kontroll	16	25.3225	1.50967
	Kontroll	17	31.5075	2.33168					Kontroll	17	41.5075	2.28749
	Kontroll	20	28.9225	2.37588					Kontroll	20	33.505	1.75893
	Kontroll	21	28.3275	1.5521					Kontroll	21	25.8625	1.54149
	Kontroll	22	21.91	1.46548					Kontroll	22	32.2	2.40416
		mean	27.3438	2.21825						mean	30.9373	2.25449
		SD	7.83129	0.72097						SD	8.25828	0.66094
		SE	2.2607	0.208126						SE	2.38396	0.190797
		n	12	12						n	12	12
	Páros t (n=6)		0.460963	0.873022					Kétmintás (n=6)		0.219616	0.733831
	Páros t (n=12)		0.0651493	0.874918					Kétmintás (n=12)		0.0743973	0.0859624
0.hét			"+"25min					16.hét			"+"25min
			Mean	STV							Mean	STV
PQ	Futó	1	109.405	2.71529				PQ	Futó	1	116.258	5.91848
	Futó	4	81.659	1.57377					Futó	4	82.52	3.4772
	Futó	10	91.2725	2.89207					Futó	10	99.2575	2.59862
	Futó	7	100.135	2.41831					Futó	7	117.005	3.53553
	Futó	8	123.458	7.88424					Futó	8	119.812	5.97859
	Futó	9	92.575	2.56326					Futó	9	110.455	6.84479
	Futó	13	102.032	6.75464					Futó	13	116.093	5.23082
	Futó	14	86.1475	2.90267					Futó	14	105.51	4.14011
	Futó	18	96.2775	2.94864					Futó	18	116.39	6.11294
	Futó	19	106.025	2.85671					Futó	19	109.38	2.70468
	Futó	23	101.225	4.21612					Futó	23	144.993	4.92235
	Futó	24	117.797	3.17491					Futó	24	123.9	2.75241
		mean	100.667	3.57505						mean	113.464	4.51804
		SD	12.3049	1.86311						SD	14.8551	1.5077
		SE	3.55211	0.537834						SE	4.28831	0.435236
		n	12	12						n	12	12
	Páros t (n=6)		0.0752513	0.19484
	Páros t (n=12)		0.00446828	0.11905
PQ	Kontroll	2	102.392	2.79307				PQ	Kontroll	2	102.533	2.28395
	Kontroll	3	97.87	4.29391					Kontroll	3	67.6775	2.66579
	Kontroll	5	86.23	1.99758					Kontroll	5	88.7925	4.06056
	Kontroll	6	105.138	4.93914					Kontroll	6	115.282	4.10299
	Kontroll	11	99.865	5.00808					Kontroll	11	98.7475	4.10475
	Kontroll	12	104.507	4.04995					Kontroll	12	108.735	2.79307
	Kontroll	15	88.6575	2.11955					Kontroll	15	105.745	4.90025
	Kontroll	16	113.735	7.92313					Kontroll	16	122.292	8.2484
	Kontroll	17	123.227	5.56139					Kontroll	17	116.752	6.36573
	Kontroll	20	118.165	4.49013					Kontroll	20	114.063	2.44305
	Kontroll	21	102.982	8.46584					Kontroll	21	96.3125	2.89914
	Kontroll	22	102.377	4.0199					Kontroll	22	112.085	3.96157
		mean	103.762	4.63847						mean	104.085	4.0691
		SD	10.7791	2.00252						SD	14.9422	1.76437
		SE	3.11166	0.578078						SE	4.31345	0.50933
		n	12	12						n	12	12
	Páros t (n=6)		0.699049	0.385316					Kétmintás (n=6)		0.268609	0.107377
	Páros t (n=12)		0.927899	0.37493					Kétmintás (n=12)		0.137314	0.509769
			Mean	STV							Mean	STV
QRS	Futó	1	53.965	1.85969				QRS	Futó	1	54.795	1.99404
	Futó	4	57.2231	2.52564					Futó	4	77.6075	2.79307
	Futó	10	56.95	1.99227					Futó	10	52.42	1.26219
	Futó	7	64.34	2.15668					Futó	7	67.035	3.08652
	Futó	8	55.1625	3.11304					Futó	8	71.71	4.88611
	Futó	9	55.1275	2.50846					Futó	9	68.6425	3.80423
	Futó	13	51.56	1.36472					Futó	13	67.255	2.73474
	Futó	14	68.8825	3.0989					Futó	14	70.0925	2.53498
	Futó	18	63.6	2.76125					Futó	18	79.8875	4.54316
	Futó	19	56.3725	1.83494					Futó	19	65.5425	1.93924
	Futó	23	56.675	2.00642					Futó	23	76.9275	4.13657
	Futó	24	78.7525	2.50669					Futó	24	84.82	3.41356
		mean	59.8842	2.3593						mean	69.7279	3.09403
		SD	7.73549	0.456818						SD	9.55173	1.10521
		SE	2.23304	0.186495						SE	2.75735	0.319046
		n	12	6						n	12	12
	Páros t (n=6)		0.0977836	0.157422
	Páros t (n=12)		0.00193291	0.0146705
QRS	Kontroll	2	50.2775	1.63695				QRS	Kontroll	2	47.8975	1.79075
	Kontroll	3	57.305	1.81019					Kontroll	3	58.6875	2.09127
	Kontroll	5	66.56	2.5668					Kontroll	5	49.935	1.90389
	Kontroll	6	61.72	3.04056					Kontroll	6	59.685	1.76423
	Kontroll	11	63.7175	2.97692					Kontroll	11	64.5025	4.18254
	Kontroll	12	50.735	2.43952					Kontroll	12	51.5475	2.5173
	Kontroll	15	52.98	2.60392					Kontroll	15	52.085	1.35765
	Kontroll	16	72.8075	3.01227					Kontroll	16	78.6025	2.75595
	Kontroll	17	57.2875	3.3676					Kontroll	17	60.18	2.65872
	Kontroll	20	65.0475	4.01283					Kontroll	20	59.085	3.56912
	Kontroll	21	65.4175	1.70059					Kontroll	21	52.905	1.10839
	Kontroll	22	75.4825	1.8756					Kontroll	22	69.3075	1.8756
		mean	61.6115	2.58698						mean	58.7017	2.29795
		SD	8.15467	0.738623						SD	8.88116	0.893069
		SE	2.35405	0.213222						SE	2.56377	0.257807
		n	12	12						n	12	12
	Páros t (n=6)		0.331326	0.919716					Kétmintás (n=6)		0.0647815	0.379121
	Páros t (n=12)		0.147659	0.176942					Kétmintás (n=12)		0.00777784	0.0652062
			Mean	STV	RRmean	QTc					Mean	STV	RRmean	QTc
QT	Futó	1	246.218	2.68877	568.975	244.346		QT	Futó	1	281.47	6.35159	804.375	268.935
	Futó	4	253.369	3.57361	482.55	255.412			Futó	4	304.502	3.79893	603.525	301.066
	Futó	10	261.618	2.53321	629.263	257.015			Futó	10	246.525	3.22617	484.762	248.468
	Futó	7	266.917	3.98101	540.638	266.329			Futó	7	279.98	2.83903	759.025	269.499
	Futó	8	264.778	6.49478	648.825	259.288			Futó	8	275.223	1.91626	1141.46	247.417
	Futó	9	248.092	2.99106	464.125	250.97			Futó	9	300.99	5.27502	709.875	292.735
	Futó	13	246.338	2.02233	688.875	239.034			Futó	13	275.363	5.26971	1141.94	247.535
	Futó	14	231.603	2.33699	521.763	231.869			Futó	14	286.695	4.72524	899.5	269.85
	Futó	18	264.59	3.16077	864.7	249.322			Futó	18	286.098	5.96445	1090.49	260.601
	Futó	19	254.2	4.41411	578.15	251.913			Futó	19	279.36	2.34406	586.775	276.682
	Futó	23	249.662	4.93737	606.55	246.089			Futó	23	309.428	7.30795	1365.53	271.472
	Futó	24	269.202	3.07768	601.163	265.873			Futó	24	286.68	5.58084	1099.11	260.793
		mean	254.716	3.51764	599.631	251.455				mean	284.359	4.54994	890.53	267.921
		SD	11.0915	1.27153	106.425	10.2658				SD	16.4399	1.70658	275.021	16.8677
		SE	3.20185	0.36706	30.7223	2.96348				SE	4.7458	0.492646	79.3917	4.86928
		n	12	12	12	12				n	12	12	12	12
	Páros t (n=6)		0.0724183	0.877084	0.0692776	0.184506
	Páros t (n=12)		0.000757952	0.180896	0.00162228	0.0151
			Mean	STV	RRmean	QTc					Mean	STV	RRmean	QTc
QT	Kontroll	2	240.527	3.68226	508.325	241.403		QT	Kontroll	2	222.11	2.42538	499.238	223.397
	Kontroll	3	264.288	4.05879	677.038	257.52			Kontroll	3	270.618	5.12829	641.225	265.473
	Kontroll	5	234.85	2.06298	544.438	234.09			Kontroll	5	230.355	2.90091	435.725	234.519
	Kontroll	6	255.94	3.5373	598.8	252.717			Kontroll	6	270.295	3.50725	666.225	264.018
	Kontroll	11	238.195	3.80247	500.15	239.441			Kontroll	11	252.73	3.95803	592.087	249.811
	Kontroll	12	289.625	4.13127	531.125	289.468			Kontroll	12	283.665	3.44007	540.2	283.097
	Kontroll	15	226.928	2.76479	390.238	233.153			Kontroll	15	245.695	5.0399	602.263	242.315
	Kontroll	16	260.215	4.4424	624.85	255.812			Kontroll	16	268.947	3.69463	820.025	255.703
	Kontroll	17	287.275	4.19845	1055.3	263.373			Kontroll	17	327.648	3.69287	1304.99	292.434
	Kontroll	20	261.905	4.80479	632	257.178			Kontroll	20	245.093	2.66756	584.513	242.517
	Kontroll	21	253.955	3.13602	722.65	245.122			Kontroll	21	253.955	2.88146	544.55	253.19
	Kontroll	22	249.51	3.69817	592.6	246.568			Kontroll	22	246.498	3.93505	660.263	240.49
		mean	255.268	3.69331	614.793	251.32				mean	259.801	3.60595	657.608	253.914
		SD	19.3506	0.753426	164.47	15.4414				SD	27.7121	0.850401	225.511	19.8717
		SE	5.58604	0.217495	47.4783	4.45755				SE	7.9998	0.24549	65.0995	5.73647
		n	12	12	12	12				n	12	12	12	12
	Páros t (n=6)		0.849907	0.970334	0.936645	0.847896			Kétmintás (n=6)		0.071212	0.667097	0.0839488	0.188231
	Páros t (n=12)		0.358695	0.797094	0.280952	0.500369			Kétmintás (n=12)		0.0149467	0.100395	0.0334473	0.0760752
			Mean	STV							Mean	STV
TpTe	Futó	1	23.2725	3.0989				TpTe	Futó	1	33.035	2.20617
	Futó	4	25.9103	3.23819					Futó	4	37.0575	3.14486
	Futó	10	27.5225	3.09713					Futó	10	32.44	2.66579
	Futó	7	42.18	4.15072					Futó	7	46.9875	2.79838
	Futó	8	45.265	3.71761					Futó	8	56.015	4.33633
	Futó	9	27.1975	1.8703					Futó	9	43.5975	4.92853
	Futó	13	30.74	2.00642					Futó	13	35.975	4.59619
	Futó	14	34.3025	2.23623					Futó	14	34.735	3.76358
	Futó	18	30.205	2.1496					Futó	18	42.3425	3.17844
	Futó	19	24.3075	2.37588					Futó	19	33.01	1.47609
	Futó	23	35.655	2.80368					Futó	23	42.94	4.42119
	Futó	24	37.3775	2.74357					Futó	24	49.005	4.03228
		mean	31.9946	2.79068						mean	40.595	3.46232
		SD	7.05511	0.704085						SD	7.48528	1.05805
		SE	2.03664	0.203252						SE	2.16082	0.305431
		n	12	12						n	12	12
	Páros t (n=6)		0.00290513	0.823524
	Páros t (n=8)		2.45384e-05	0.130731
TpTe	Kontroll	2	20.6	2.63044				TpTe	Kontroll	2	15.71	3.36229
	Kontroll	3	30.2125	3.90146					Kontroll	3	26.715	5.84777
	Kontroll	5	32.2075	1.73241					Kontroll	5	29.16	3.26153
	Kontroll	6	40.905	2.30517					Kontroll	6	50.745	3.55144
	Kontroll	11	31.615	3.30572					Kontroll	11	44.7025	2.48548
	Kontroll	12	46.4275	4.22143					Kontroll	12	29.02	2.29633
	Kontroll	15	32.1875	2.29279					Kontroll	15	26.2625	2.52967
	Kontroll	16	40.07	1.95515					Kontroll	16	31.8125	2.92035
	Kontroll	17	22.8675	1.91979					Kontroll	17	44.3475	2.20794
	Kontroll	20	39.22	3.25446					Kontroll	20	38.3175	1.8261
	Kontroll	21	29.4775	2.96631					Kontroll	21	30.5475	2.24506
	Kontroll	22	31.2575	1.89328					Kontroll	22	34.285	1.81019
		mean	33.0873	2.6982						mean	33.4688	2.86201
		SD	7.47248	0.830146						SD	9.67537	1.10221
		SE	2.15712	0.239642						SE	2.79304	0.31818
		n	12	12						n	12	12
	Páros t (n=6)		0.835682	0.496387					Kétmintás (n=6)		0.19866	0.861448
	Páros t (n=8)		0.901222	0.646258					Kétmintás (n=8)		0.0559473	0.18727
[truncated: 5 more columns]

## Sheet: ECG parameters
ECG parameters
		0th week	16th week	0th week	16th week	0th week	16th week	0th week			16th week			0th week	16th week
		RR		PQ		QRS		QT						TpTe
		Mean	Mean	Mean	Mean	Mean	Mean	Mean	QTc	STV	Mean	QTc	STV	Mean	Mean
Trained	1	563.475	585.6	103.002	109.952	50.84	58.87	208.095	209.838	2.23799	249.898	239.649	2.6216	19.8	33.03
Trained	4	499.587	745.413	81.1725	84.5725	58.6125	68.0325	219.822	225.068	3.00167	255.695	254.401	2.89737	27.005	33.1825
Trained	10	502.075	626.612	87.0325	98.9881	57.7025	65.7381	224.082	220.6	2.32638	236.805	242.008	2.63145	16.84	34.2952
Trained	7	494.025	777.575	97.14	118.325	63.335	65.3775	224.645	228.742	3.05293	258.502	245.166	6.53543	34.7575	43.5275
Trained	8	606.475	1013.56	108.323	110.943	47.32	73.23	215.947	211.022	3.47543	238.65	211.647	2.58271	47.0825	48.4675
Trained	9	505.887	712.038	99.595	107.24	57.8125	68.9975	214.5	212.922	2.7312	252.667	238.201	4.13481	23.02	33.9225
Trained	13	538.85	1068.79	94.85	99.65	55.63	75.675	217.868	206.359	1.62281	243.905	226.943	3.3128	23.495	32.3125
Trained	14	398.038	1051.12	93.8425	109.863	65.925	72.33	188.787	191.413	1.85262	252.97	234.313	2.37058	23.045	30.11
Trained	18	657.962	1005.48	88.795	113.33	69.67	73.41	216.74	209.638	2.36174	252.47	226.584	3.24385	34.8175	37.685
Trained	19	497.225	440.413	105.25	122.32	61.995	73.2875	216.312	215.655	3.44007	236.802	231.039	5.06112	23.35	28.5425
Trained	23	591.15	791.85	104.743	129.312	57.7175	75.215	227.555	219.075	2.15844	270.395	246.627	3.72645	37.4475	40.3375
Trained	24	677.4	1128.61	116.195	123.7	78.87	79.925	216.445	212.402	1.91096	266.883	248.278	3.66812	24.6675	42.07
	mean	544.346	828.922	98.3283	110.683	60.4525	70.8407	215.9	213.561	2.51435	251.304	237.071	3.56552	27.944	36.4569
	SD	78.9055	221.094	9.89968	12.3241	8.41168	5.68897	9.98938	9.66273	0.618921	10.9612	11.7474	1.21314	8.74202	5.99985
	SE	22.778	63.8243	2.85779	3.55765	2.42824	1.64226	2.88369	2.78939	0.178667	3.16422	3.39119	0.350203	2.5236	1.73201
	n	12	12	12	12	12	12	12	12	12	12	12	12	12	12
		0th week	16th week	0th week	16th week	0th week	16th week	0th week			16th week			0th week	16th week
		RR		PQ		QRS		QT			QT			TpTe
		Mean	Mean	Mean	Mean	Mean	Mean	Mean	QTc	STV	Mean	QTc	STV	Mean	Mean
Sedentary	2	392.6	402.55	114.82	110.897	53.1	50.8625	224.66	221.588	2.57387	221.348	215.566	1.4478	14.92	20.265
Sedentary	3	743.8	688.425	100.685	72.225	58.095	56.0775	236.752	226.356	4.10652	239.758	230.137	2.8408	17.715	22.8525
Sedentary	5	451.575	503.163	97.5375	98.8	51.6775	41.51	207.517	209.342	3.3676	207.33	211.607	1.68999	33.6225	22.6375
Sedentary	6	493.775	572.138	104.263	102.28	57.87	55.605	203.535	205.216	1.90212	229.963	225.994	4.1843	43.1775	44.4725
Sedentary	11	442.887	528.312	101.9	102.097	67.325	55.8175	215.115	215.413	3.22087	217.34	216.243	3.72115	29.9025	40.775
Sedentary	12	491.387	585.188	104.982	101.438	55.1125	48.07	249.592	248.735	2.77539	225.237	225.65	2.95747	33	35.66
Sedentary	15	532.475	548.188	87.51	97.8	55.4925	53.6175	182.422	185.209	1.40714	216.405	212.267	2.0842	21.3775	26.1875
Sedentary	16	574.7	672.163	105.683	109.3	59.9025	74.035	208.57	206.003	3.25976	214.39	198.508	2.17435	23.7425	25.3225
Sedentary	17	699.05	788.65	108.343	111.03	57.3175	55.615	242.82	232.773	2.786	284.755	256.151	2.12486	31.5075	41.5075
Sedentary	20	481.125	620.587	109.29	111.32	69.7725	55.4275	237.317	226.006	2.22739	211.545	214.341	2.84434	28.9225	33.505
Sedentary	21	394.462	543.812	104.332	104.468	62.4375	56.8875	206.732	205.067	1.92687	206.732	207.594	2.56503	28.3275	25.8625
Sedentary	22	495.173	597.03	99.03	112.253	67.445	71.6975	209.665	209.956	1.72534	201.148	198.538	2.31224	21.91	32.2
	mean	516.084	587.517	103.198	102.826	59.629	56.2685	218.725	215.972	2.60657	222.996	217.716	2.57888	27.3438	30.9373
	SD	109.279	98.8656	6.83543	10.9491	5.91858	8.92994	19.6689	16.3945	0.798409	22.196	15.6303	0.793142	7.83129	8.25828
	SE	31.5462	28.54	1.97322	3.16074	1.70855	2.57785	5.67794	4.73267	0.230481	6.40744	4.51209	0.22896	2.2607	2.38396
	n	12	12	12	12	12	12	12	12	12	12	12	12	12	12
